# Supplementary material for: First Results of Phase 3 Trial of RTS,S/AS01 Malaria Vaccine in African Children
Source: Atypon-hosted journal article supplement (doi:10.1056/nejmoa1102287), 2011-10-18
Supplement: nejmoa1102287_appendix.pdf [file nejmoa1102287_appendix.pdf]

## Supplementary Appendix

This appendix has been provided by the authors to give readers additional information about their work.

Supplement to: The RTS,S Clinical Trials Partnership. First results of phase 3 trial of RTS,S/AS01 malaria vaccine in African children. *N Engl J Med* 2011;365:1863-75. DOI: [10.1056/NEJMoa1102287](https://doi.org/10.1056/NEJMoa1102287).

# Table of Contents

|                                                                                                                                                                                                               |    |
|---------------------------------------------------------------------------------------------------------------------------------------------------------------------------------------------------------------|----|
| 1. AUTHORS AND AFFILIATIONS.....                                                                                                                                                                              | 4  |
| 2. SUPPLEMENTARY METHODS .....                                                                                                                                                                                | 4  |
| 2.1. Ethical considerations .....                                                                                                                                                                             | 4  |
| 2.2. Roles of investigators and sponsor .....                                                                                                                                                                 | 4  |
| 2.3. Study sites.....                                                                                                                                                                                         | 5  |
| 2.4. Screening and informed consent.....                                                                                                                                                                      | 6  |
| 2.5. Randomization and blinding .....                                                                                                                                                                         | 8  |
| 2.6. Study vaccines .....                                                                                                                                                                                     | 9  |
| 2.7. Bednets and indoor residual spraying (IRS).....                                                                                                                                                          | 10 |
| 2.8. Safety assessments .....                                                                                                                                                                                 | 11 |
| 2.9. Surveillance for clinical and severe malaria episodes.....                                                                                                                                               | 13 |
| 2.10. Chest X-rays .....                                                                                                                                                                                      | 14 |
| 2.11. Anthropometry.....                                                                                                                                                                                      | 15 |
| 2.12. Laboratory analysis .....                                                                                                                                                                               | 15 |
| 2.13. Immunological assessment.....                                                                                                                                                                           | 19 |
| 2.14. Data collection and management and statistical analysis .....                                                                                                                                           | 19 |
| 2.15. Concordance in blood slide readings .....                                                                                                                                                               | 20 |
| 3. MAJOR PROTOCOL DEVIATIONS.....                                                                                                                                                                             | 20 |
| 4. ACKNOWLEDGEMENTS .....                                                                                                                                                                                     | 22 |
| 5. GROUPS THAT HAVE CONTRIBUTED TO THE DELIVERY OF THIS TRIAL.....                                                                                                                                            | 26 |
| 6. DETAILED CONTRIBUTIONS TO THE STUDY .....                                                                                                                                                                  | 27 |
| 7. CONFLICTS OF INTEREST .....                                                                                                                                                                                | 29 |
| 8. REFERENCES .....                                                                                                                                                                                           | 32 |
| 9. SUPPLEMENTARY TABLES AND FIGURES .....                                                                                                                                                                     | 35 |
| Supplementary figure 1. Study sites and malaria endemicity .....                                                                                                                                              | 35 |
| Supplementary figure 2. Study design .....                                                                                                                                                                    | 36 |
| Supplementary figure 3. Incidence of solicited local and general adverse events reported during the 7-day post vaccination period following each dose in children 5-17 months of age at enrollment (ITT)..... | 37 |
| Supplementary figure 4. Reverse cumulative distribution curve for Anti-CS antibody titers in children 5-17 months at 1 month post-Dose 3 (ATP).....                                                           | 38 |
| Supplementary table 1. List of Ethic Committees and Review Boards .....                                                                                                                                       | 39 |
| Supplementary table 2. Case definitions of severe malaria .....                                                                                                                                               | 40 |
| Supplementary table 3. Algorithm for the evaluation of a hospital admission as a potential case of severe malaria.....                                                                                        | 41 |
| Supplementary table 4. Grading of solicited adverse events (AEs).....                                                                                                                                         | 42 |
| Supplementary table 5a. First 6000 children aged 5-17 months enrolled, number by site.....                                                                                                                    | 43 |
| Supplementary table 5b. Number of children aged 6 weeks - 17 months enrolled by site .....                                                                                                                    | 44 |

|                                                                                                                                                                                                                                     |    |
|-------------------------------------------------------------------------------------------------------------------------------------------------------------------------------------------------------------------------------------|----|
| Supplementary table 6. Malaria prevention in the first 6000 children aged 5-17 months at enrollment at 14 months post Dose-1 (ITT).....                                                                                             | 45 |
| Supplementary table 7. composition of the cohort that included both the younger and older age-categories.....                                                                                                                       | 46 |
| Supplementary table 8a. Baseline characteristics in the first 6000 children aged 5-17 months at enrollment (ITT).....                                                                                                               | 47 |
| Supplementary table 8b. Baseline characteristics in children aged 6 weeks - 17 months at enrollment (ITT).....                                                                                                                      | 48 |
| Supplementary table 8c. Baseline characteristics in the first 6000 children aged 5-17 months at enrollment (ATP).....                                                                                                               | 49 |
| Supplementary table 9. Vaccine efficacy: model selection using Cox regression with time dependent covariates for clinical malaria disease (primary case definition) (ATP).....                                                      | 50 |
| Supplementary table 10a. Clinical features of children with severe malaria aged 6 weeks - 17 months at enrollment (ATP).....                                                                                                        | 51 |
| Supplementary table 10b. Frequency of co-morbidities in children with severe malaria 6 weeks - 17 months of age at enrollment (ATP).....                                                                                            | 52 |
| Supplementary table 11a. Percentage of children aged 5-17 months at enrollment reporting a fatal serious adverse event over an average follow-up period 18 months (up to 24 months) post Dose-1 by MEDRA Preferred Term (ITT).....  | 53 |
| Supplementary table 11b. Percentage of children aged 6-12 weeks at enrollment reporting a fatal serious adverse event over an average follow-up period of 9 months (up to 17 months) post Dose-1 by MEDRA Preferred Term (ITT)..... | 55 |
| Supplementary table 12. Percentage of children aged 5-17 months at enrollment reporting adverse events (AEs) within the 30-day post-vaccination period (ITT).....                                                                   | 56 |
| Supplementary table 13a. Incidence of solicited local adverse events in children aged 5-17 months at enrollment reported during the 7-day post-vaccination period following each dose and overall (ITT).....                        | 57 |
| Supplementary table 13b. Incidence of solicited general adverse events in children aged 5-17 months at enrollment reported during the 7-day post-vaccination period following each dose and overall (ITT).....                      | 58 |
| Supplementary table 14. Seropositivity rates and geometric mean titers (GMTs) for Anti-CS antibodies (ATP).....                                                                                                                     | 59 |

## **1. AUTHORS AND AFFILIATIONS**

Submitted by the RTS,S Clinical Trials Partnership.

## **2. SUPPLEMENTARY METHODS**

### **2.1. Ethical considerations**

This phase III, double-blind (observer-blind), randomized, controlled multi-center study is currently being undertaken in 11 centers across sub-Saharan Africa. The study design and rationale for selection of endpoints have been described previously.<sup>1</sup> The study is being conducted in accordance with the current Declaration of Helsinki, International Committee on Harmonization Good Clinical Practice guidelines<sup>2</sup> and with the local rules and regulations of each country. The study is monitored by the sponsor, GlaxoSmithKline, and overseen by a formally constituted Independent Data Monitoring Committee (IDMC), that reviewed, among other information, unblinded comprehensive safety data every 3 months to authorize trial continuation. The IDMC conferred before the initiation of the study and has had 3-monthly teleconferences and 1 annual meeting thereafter. A Local Safety Monitor was available at each study center. The study protocol, and amendments 1 to 3, consent forms, and other information that required pre-approval were reviewed and approved by a national, regional, or research center IEC or IRB as per local requirements. A list of all IEC/IRBs is provided in supplementary table 1.

### **2.2. Roles of investigators and sponsor**

The study is sponsored by GlaxoSmithKline Biologicals (GSK), the vaccine developer and manufacturer, and funded by both GSK Biologicals and the PATH Malaria Vaccine

Initiative (MVI). The data generated by the trial are subject to a confidentiality agreement between the sponsor and investigators, which allows the investigators full access to the study data at the end of the study and includes an obligation to permit publication without excessive delay.

### **2.3. Study sites**

The study is being conducted in 11 sites located in 7 countries in sub-Saharan Africa:

- Institut de Recherche en Science de la Santé, Nanoro, Burkina Faso
- Albert Schweitzer Hospital, Lambarene, Gabon
- School of Medical Sciences, Kumasi, Ghana.
- Kintampo Health Research Center, Kintampo, Ghana
- KEMRI - Walter Reed Project, Kombewa, Kenya
- KEMRI - Wellcome Trust Research Program, Kilifi, Kenya
- KEMRI/CDC Research and Public Health Collaboration, Siaya, Kenya
- University of North Carolina Project, Lilongwe, Malawi
- Centro de Investigação em Saúde de Manhiça, Manhiça, Mozambique
- Ifakara Health Institute, Bagamoyo, Tanzania
- National Institute of Medical Research, Korogwe, Tanzania

These sites represent the range of malaria transmission seen across sub-Saharan Africa (Supplementary figure1).

## 2.4. Screening and informed consent

Two groups of children were eligible for inclusion in the trial. One group comprised children who were between 6 to 12 weeks of age (inclusive) at the time of first vaccination who had not previously received a dose of vaccine against diphtheria, tetanus, pertussis or *Haemophilus influenzae* type b and the other group comprised children between 5 to 17 months of age at the time of first vaccination. Screening procedures included a review of the child's medical history, a physical examination and a blood test for assessment of hemoglobin concentration. The main exclusion criteria were: moderate or severe illness at the time of enrolment, major congenital defects, malnutrition requiring hospitalization, severe anemia - defined as a hemoglobin concentration < 5.0 g/dL or a hemoglobin concentration < 8.0 g/dL associated with clinical sign of heart failure or severe respiratory distress, or a past history of a neurological disorder or atypical febrile seizure. A febrile seizure is atypical if it meets one of the following criteria: not associated with fever; lasts > 5 minutes; focal (not generalized); followed by transient or persistent neurological abnormality; occurs in a child < 6 months of age. A past history of a simple febrile seizure was not an exclusion criterion. Children with active HIV disease of Stage III or Stage IV severity, as defined by the World Health Organization, at the time of screening were excluded.<sup>3</sup> A previous history of active Stage III or Stage IV HIV disease was not an exclusion criterion.

Prior to enrolment, study teams conducted a series of information activities. Study teams held discussion meetings with the administrative leaders and/or community leaders. They described the outline of the proposed study, paying particular attention to study

procedures including screening of children, immunization, blood collection, follow up and their associated risks.

Following the community meetings, and a positive recommendation from community leaders, the parent(s)/guardian(s) of children in the eligible age groups were approached. The need for a vaccine against malaria was discussed and the objectives of the study were explained. The study procedures were carefully described including immunization and blood collection. Parent(s)/guardian(s) interested in enrolling their child into the study were invited to the screening visit.

Formal consent was obtained from each child's parent(s) or guardian(s) prior to the performance of any study-specific procedures. The site investigator or his/her designate described the protocol to the parent(s)/guardian(s) of potential participating children face to face or the informed consent information was presented to groups at an initial information session. Information was provided in both oral and written form in a language fully comprehensible to the child's family. Each child's family had the opportunity to inquire about details of the study and ask any questions individually in a private place. Literate parent(s)/guardians willing to let their child enter into the study were asked to sign and date the informed consent form (ICF). If the parents or guardians were illiterate, the study and the ICF were explained point by point in the presence of an impartial witness. The impartial witness could be a friend or family member accompanying the parents or any other literate person independent from the study team. Parent(s)/guardian(s) confirmed their consent for their child to take part in the study by marking the ICF with their thumbprint and the impartial witness personally signed and dated the ICF.

## **2.5. Randomization and blinding**

After verification of eligibility criteria, and prior to the first vaccination, a unique treatment number was assigned to each participating child. Participating children from each age-category were randomized into one of 3 study groups according to a 1:1:1 ratio (R3R, R3C or C3C) using a randomization algorithm at GSK Biologicals using SAS version 9.1 (Supplementary figure 2). Randomization was stratified for age-category using center as a minimization factor, ensuring balanced treatment allocation within each study center. All children's parent(s)/guardian(s) were provided with a study identification card with a photo of their child, the child's name and a unique subject number. All data were collected using remote data entry (RDE) and electronic case report forms (eCRF).

Data were collected in a double-blinded (observer-blind) manner; the vaccinated children and their parent(s)/guardian(s) as well as those responsible for the evaluation of study endpoints were unaware of whether RTS,S/AS01 or control vaccine had been administered to a particular child. The vaccines used in this study were of different appearance. The content of the syringe was, therefore, masked with an opaque tape to ensure that parent(s)/guardian(s) were blinded. The only study staff who knew of the vaccine assignment were those responsible for preparation and administration of vaccines; these staff played no other role in the study except screening or collection of biologic specimens.

## 2.6. Study vaccines

Each child received 3 doses of either the candidate malaria vaccine RTS,S/AS01 or the control vaccine; in the 6-12 weeks age group the control vaccine was a Meningococcal C conjugate vaccine Menjugate™ (Novartis) while in the 5-17 months age group the control vaccine was a rabies vaccine VeroRab™ (Sanofi-Pasteur) (Supplementary figure 2). Vaccines were administered intramuscularly into the left deltoid for the 5-17 months age-category and into the left anterolateral thigh for the 6-12 weeks age-category. The choice of control vaccines was guided by the principles of benefit to the control group without compromising the evaluation of clinical study endpoints.

The RTS,S/AS01 candidate vaccine has been developed and manufactured by GSK Biologicals and is designed to protect against *P. falciparum* malaria. “RTS,S” comprises the carboxyl terminal portion of the circumsporozoite protein fused to the hepatitis B surface antigen, co-expressed in yeast with non-fused hepatitis B surface antigen. “AS01” describes the Adjuvant System comprising liposomes, MPL (3-D-deacylated Monophosphoryl Lipid A) and QS21 (a triterpene glycoside purified from the bark of *Quillaja saponaria*). Each dose of reconstituted RTS,S/AS01 (0.5 mL) contains approximately 25 µg of antigen, 25 µg of MPL and 25 µg of QS21 with liposomes.<sup>4</sup>

Sanofi Pasteur’s chromatographically purified Vero cell culture rabies vaccine VeroRab™ is based on inactivated Wistar Rabies PM/W138 1503-3M strain and it is given in a  $\geq 2.5$  IU/0.5 mL dose.

One dose (0.5 mL) of Novartis’s Menjugate contains 10 µg *Neisseria meningitidis* (strain C11) Group C oligosaccharide conjugated to 12.5-25 µg *Corynebacterium diphtheriae*

CRM<sub>197</sub> protein adsorbed on aluminum hydroxide (1.0 mg). The excipients of the reconstituted vaccine include mannitol, sodium phosphate monobasic monohydrate, sodium phosphate dibasic heptahydrate, sodium chloride and water for injections.

Children were observed closely for at least 30 minutes after vaccination, with appropriate medical treatment and equipment readily available in case of an anaphylactic reaction. A study doctor accredited in pediatric resuscitation was available at all vaccination sessions.

## **2.7. Bednets and indoor residual spraying (IRS)**

The research team ensured that insecticide treated bednet use was optimized in each study population: in 2 centers (Kilifi, Kenya and Bagamoyo, Tanzania) this was achieved through close collaboration with the National Malaria Control Programs. In the other centers, impregnated bednets were distributed by the study teams to all children who consented for screening, regardless of whether they were eligible for the trial.

Data were collected on malaria control measures used by the participants' families during the period of surveillance. Bednet usage and indoor residual spraying (IRS) were documented 12 months after the third vaccine dose had been given. Children's parents were asked if their house had been sprayed with a residual insecticide and if so when this was done. Then they were asked if their child sleeps under a bednet. During a home visit, a field worker inspected the child's bednet and the integrity of the net was recorded as follows: 1: no bednet; 2: impregnated bednet with no hole large enough to admit three fingers; 3: impregnated bednet with at least one hole large enough to admit three fingers; 4: untreated bednet with no hole large enough to admit three fingers; 5: untreated bednet with at least one hole large enough to admit three fingers.

## **2.8. Safety assessments**

During the study, investigators or their colleagues were responsible for documenting and reporting events meeting the criteria and definition of an adverse event (AE) or serious adverse event (SAE). Parents/guardians of children participating in the study were requested to contact study personnel immediately if their child showed any signs or symptoms they perceived as serious.

An adverse event (AE) was defined as any untoward medical occurrence in a child participating in the clinical trial, temporally associated with vaccination whether or not considered related to the vaccine. An AE could, therefore, be any unfavorable and unintended sign (including an abnormal laboratory finding), symptom, or disease (new or exacerbated) temporally associated with vaccination.

For the purpose of this study, a serious adverse event (SAE) was defined as any untoward medical occurrence that resulted in death, was life-threatening, required hospitalization or prolongation of existing hospitalization, resulted in disability/incapacity, or a seizure within 30 days of vaccination. Abnormal laboratory findings that were judged by the assessing clinician to be clinically significant were recorded as SAEs if they met the previously defined criteria.

Seizures and immune-mediated disorders were reported as SAEs in order to ensure availability of full case narrative descriptions.<sup>1</sup> Data on seizures occurring within 7 days following vaccination were collected according to the Brighton Collaboration guidelines.<sup>5</sup>

Because pediatric auto-immune diseases are rare and may be underestimated in sub-Saharan Africa, training material on pediatric auto-immune disease presentation and

diagnosis was provided by the study sponsor. A specific, standardized clinical data collection questionnaire was generated. Collaborations with reference laboratories in South Africa were initiated so that serum samples or histopathologic specimens could be sent to South Africa for analyses not locally available.

All solicited AEs were reported for 7 days (day of vaccination and 6 subsequent days) following each vaccine dose for the first 200 children enrolled at each center. Local AEs solicited were: pain at injection site; swelling at injection site and redness at injection site. Solicited general AEs were: drowsiness, fever; irritability/fussiness and loss of appetite. Intensity of AEs was assessed as described in supplementary table 4.

All unsolicited AEs were reported for 30 days following each vaccine dose for the first 200 participating children enrolled at each center.

SAEs were collected for all participating children throughout the study period, from the time of parental consent. At every visit/contact, information was sought on the occurrence of AEs/SAEs. SAEs were identified by surveillance at health facilities in the study area and through monthly home visits with the participating children. All AEs that were observed directly or that were observed by a clinical collaborator, those that were identified through surveillance at health facilities in the study area or those reported by the child's parent/guardian spontaneously or in response to a direct question were evaluated.

Assessments were made of the maximum intensity of all unsolicited AEs and SAEs during the period of the event. The assessment was based on the attending clinician's medical judgment. A grade was assigned to all adverse events as follows; grade 1 (mild):

an AE which is easily tolerated by the child, causing minimal discomfort and not interfering with everyday activities; grade 2 (moderate): an AE which is sufficiently discomforting to interfere with normal everyday activities and grade 3 (severe): an AE which prevents normal, everyday activities.

SAEs were coded according to the MedDRA (Medical Dictionary for Drug Regulatory Activities). Non-malaria SAEs were defined as those which excluded the MedDRA terms “*Plasmodium falciparum* infection”, “Malaria” and “Cerebral malaria”.

Verbal autopsies were carried out on all children who died outside a health facility to ascribe the cause of death using a questionnaire based on the International Network for the Demographic Evaluation of Populations and Their Health in Developing Countries (INDEPTH) standard questionnaire, adapted to be locally appropriate.<sup>6</sup> To support the timely reporting of SAEs, diagnoses were made according to the usual processes of each center.

## **2.9. Surveillance for clinical and severe malaria episodes**

During the informed consent process, parents were asked to bring their child to a study health facility as soon as possible if their child fell sick during the trial. All participating children who presented to a health facility in the study area were evaluated as potential cases of malaria using a standardized algorithm. All parents were asked whether the child had a fever within the previous 24 hours and all children had their temperature measured. A blood sample was taken for testing for malaria parasites in all children who had a history of fever during the prior 24 hours or who had a measured axillary temperature greater or equal to 37.5°C at time of presentation.

Children who needed inpatient care were provided transport to a study hospital. All participating children who presented for admission were evaluated as potential cases of severe malaria disease following a predefined algorithm (Supplementary table 3).

Detection and management of severe malaria have been described in detail by Vekemans et al.<sup>7</sup> During any hospitalization, the child's course was monitored to capture the signs and blood parameters indicative of a progression to severe malaria. If a child's condition deteriorated following admission then additional investigation was performed.

Treatment of malaria was performed in accordance with national guidelines. In 9 of the 11 study centers, the first line treatment for uncomplicated malaria was a 6-dose regimen of artemether-lumefantrine whilst in two, both in Ghana, it was artesunate-amodiaquine. Children who required inpatient care were admitted to the hospital and received treatment with intravenous quinine, according to national guidelines,

## **2.10. Chest X-rays**

Chest X-rays were performed as part of the standardized evaluation of study children brought to a healthcare facility with tachypnea, lower chest wall indrawing, abnormally deep breathing or if a study clinician considered this to be an appropriate investigation.<sup>7</sup>

A digital X-ray system was provided to each study site to facilitate radiological assessment of study participants. The radiographer and the physician who read the images for the trial endpoints received standardized technical training by the manufacturer of the X-ray equipment and training on interpretation by expert radiologists and physicists. To ensure a robust and verifiable X-ray data base, quality control systems comprising local on-site training, development of quality manuals, quality control checks,

on-site radiology committees and external audits were implemented. Digital images were anonymized and sent to a central repository at GSK Biologicals via a satellite internet connection.

To ensure accurate diagnosis of pneumonia, a process developed by WHO<sup>10</sup> was followed. Each X-ray was read independently by a clinician attached to the center where the X-ray was taken, and by an external radiologist. GSK Biologicals reviewed all readings made by the centers and by the external radiologists and any images with discordant readings were sent to another panel of radiologists for a final reading.

Clinicians and external radiologists were trained in chest X-ray interpretation according to WHO guidelines.<sup>10</sup>

## **2.11. Anthropometry**

Length/height, weight and mid-upper arm circumference were measured at screening and one month after the third dose of vaccine. The methodologies used for anthropometry were adapted from Cogill.<sup>11</sup>

## **2.12. Laboratory analysis**

Development of standardized laboratory methods and quality control processes for this trial have been described fully in a separate publication<sup>12</sup> and are summarized briefly here.

- **Hematology and biochemistry**

Automated biochemical and hematologic methods were used. All biochemistry automated analyzers were initially enrolled with International External Quality

Assessment (EQA) but later switched to the program run by the Royal College of Pathologists of Australia, because the latter was more appropriate for the study requirements at the time. All hematology automated analyzers were enrolled in EQA. Each laboratory had to demonstrate method qualification for biochemistry and hematology, including analysis of repeatability, reproducibility, linearity, QC stability and accuracy between main and back-up analyzers. Data were sent to GSK Biologicals for analysis and feedback was provided to laboratories.

Daily internal QC was performed at each site, and external quality control was performed monthly for biochemistry and hematology samples.

- **Microbiology**

Standard microbiology methods for blood and cerebrospinal fluid (CSF) culture were followed using automated Bactec™ incubators and pediatric bottles (Bactec BD Diagnostic Systems, USA). Positive cultures were sub-cultured using standard methods.<sup>13,14</sup> For the purpose of trial analysis, as opposed to clinical care, results were classified by standardized case definitions based on an established methodology.<sup>15</sup> A blood culture was considered positive if a definite pathogen was isolated (e.g. *Streptococcus pneumoniae*, *S. agalactiae*, *S. pyogenes*, *Haemophilus influenzae*, *Salmonella* species) or if a bacterium that could be either a pathogen or a contaminant was isolated within 48 hours of incubation (e.g. *Escherichia coli*, *Klebsiella pneumoniae*, *Staphylococcus aureus*, *Enterococcus faecalis*). A blood culture was considered to be contaminated if a known contaminant was isolated or if a bacterium that could be either a pathogen or a contaminant was isolated after 48 hours of incubation.<sup>15</sup>

CSF was examined by Gram stain and a white cell count was performed using a hemocytometer. Direct agglutination methods using commercial kits (Remel Wellcogen Bacterial Meningitis Antigen Latex Kit or BIO-RAD Pastorex Meningitis Kit) were used for early detection of specific organisms like *S. pneumoniae*, group B streptococci, *H. influenzae* type b, *E. coli* and *Neisseria meningitidis*. In parallel, CSF was inoculated directly onto recommended culture media and in the same automated culture bottles used for blood culture to allow for bacterial growth, identification and antimicrobial sensitivity testing using the disk diffusion method.

Bacterial meningitis was defined as the presence of a CSF white cell count of  $\geq 50 \times 10^6/L$ , a positive CSF culture of compatible organisms or a positive CSF latex agglutination test for either *H. influenzae* type b (Hib), *N. meningitidis* or *S. pneumoniae*.<sup>7, 16</sup>

Microbiology quality assessment included evaluation of microscopy, culture and identification and antimicrobial susceptibility testing. Each laboratory received 6 samples (with at least two meningeal and two enteric organisms) three times per year, and the criteria of acceptability were defined by the National Institute of Communicable Disease (NICD, South Africa). Internal quality control was performed using American Type Culture Collection (ATCC) control strains for species identification every week or when a new batch of reagent was received or when discordant results were obtained. The contamination rate of the clinical specimens was evaluated monthly by internal assessment. Continuous assessment allowed re-training programs for both clinical and laboratory staff and more intense quality evaluation when there was a high contamination rate.

- ***P. falciparum* counts by blood smear**

All slides were read twice by two microscopists. A third independent microscopist read the slide if there were any of the following discrepancies between the first two readings: (1) a positive reading by one microscopist and a negative reading by the other; (2) both microscopists recorded a parasitemia  $>400$  parasites/ $\mu\text{L}$  but the higher count divided by the lower count was  $>2$ ; (3) at least one microscopist recorded a parasitemia  $\leq 400$  parasites/ $\mu\text{L}$  but the higher reading was more than 10 times the lower reading.

If the initial two readings gave concordant results, the final parasite density was considered to be the geometric mean of the two readings. If the readings were discordant, then the following principles were applied: (1) where one reading was positive and the other negative, the majority decision obtained following the reading by the third microscopist was adopted – and the parasite density was recorded as the geometric mean of the two positive results; (2) when all three readings were positive, the final result was the geometric mean of the two closest readings (in log scale). As a quality measure, agreement between the 2 microscopists was calculated by means of the Kappa statistic.

Internal QC was performed on one negative and one positive slide for each batch of stain. The External QA process for slide reading comprised species identification and parasite quantification. Three assessments per year were carried out, including 20 samples per microscopist. Microscopists who were below the level defined as competent were considered to be 'in training' and were not allowed to read study slides until they were retrained and re-assessed.

### **2.13. Immunological assessment**

Antibodies specific for the circumsporozoite protein tandem repeat epitope were assessed by a standard, validated ELISA with plates adsorbed with the recombinant antigen R32LR that contains the sequence [NVDP(NANP)15] 2LR.<sup>17</sup> Briefly, R32LR protein was coated onto a 96-well polystyrene plate. Serial dilutions of serum samples were added to the 96-well plate and, after incubation, the plates were washed and Horseradish Peroxidase conjugated polyclonal rabbit anti-human IgG was added. After a final washing step, a color reaction was developed with 3, 3',5,5' tetramethylbenzidine and the plates were read in an ELISA reader. Antibody concentrations were calculated from a standard curve with the software Softmax-Pro (using a four parameters equation) and expressed as EU/mL. Anti-CS antibodies were tested at the CEVAC Laboratory, University of Ghent, Belgium. The cut-off for the anti-CS ELISA was 0.5 EU/mL. Serum samples with a titer below the cut-off value were given a value of 0.25 EU/mL.

### **2.14. Data collection and management and statistical analysis**

At each study center, data were remotely entered on electronic case report forms and transferred to GlaxoSmithKline for data management. External monitors reviewed medical records, sample storage, and laboratory procedures to ensure data integrity.

In order to preserve the blinding of the ongoing trial, all data cleaning processes were blinded to study group and analyses were conducted by external statisticians, Lisa Allamassey (Keyrus) and Catherine Dettori (4Clinics), who performed the analyses using SAS v9.2 SDD (SAS Institute Inc., Cary, NC, USA) based on a cleaned dataset and quality controlled programs provided by GSK.

## **2.15. Concordance in blood slide readings**

In the 6 weeks to 17 months combined age-categories, 78,937 blood slides were read independently by two microscopists. In total, 78,800 (99.8%) were read according to the slide reading algorithm, that is each slide was read independently by 2 qualified microscopists and a 3<sup>rd</sup> reading was performed if indicated according to the protocol.

Agreement between microscopists was high: kappa=90.4 (95%CI: 90.1, 90.8).

## **3. MAJOR PROTOCOL DEVIATIONS**

- **Mozambique - Temperature Deviation**

In the center in Mozambique, study vaccines (RTS,S/AS01 or VeroRab™) were exposed to temperatures outside the acceptable storage range. Temperature deviations occurred in the fridges where the vaccines were stored in Manhiça and also during the transport to the study clinics. These temperature deviations were discovered after most of the participating children enrolled in Mozambique had been vaccinated. It was not possible to identify specifically which vaccines were exposed to these out-of-range temperatures, due to lack of information on the storage location of vaccine lots. Therefore, the most cautious approach was taken, and 996 children out of 1002 children enrolled in the 5-17 months age-category were considered to have received at least one dose of vaccine potentially exposed to an out-of range temperature. These 996 children were excluded from the ATP population for efficacy and ATP population for immunogenicity but were included in the ITT population for the analysis of safety. The IRBs, ECs and the IDMC were informed. The IDMC reviewed the safety information and no safety concerns were raised. The parents of enrolled children were also informed, and the parents/guardians of each child who had not yet received three doses of vaccine were asked to give consent for

their child to receive subsequent vaccinations. Among the 136 children who had not yet received the third dose, parents of 24 children did not give their consent for the third vaccine administration. All other children received the last dose as requested by the IRB, but these vaccinations occurred outside of the per-protocol schedule with a delay ranging from 3.5 to 4.5 months.

- **Kombewa and Korogwe - Provision of Bednets**

Two study centers, Kombewa, Kenya and Korogwe, Tanzania, deviated from the protocol requirement for bednet provision. Both site specific documents specified that an insecticide treated bednet (ITN) would be provided for each child who presented for screening, regardless of whether the parent chose to enroll their child in the study.

Recruitment began in Kombewa in August 2009 and in February 2010 in Korogwe. Both teams omitted to distribute bednets to all screened children. The respective IRBs and ECs and the IDMC were notified when this was ascertained. The team at Kombewa purchased ITNs and started to distribute bednets in February 2010. In June 2010, Korogwe received bednets donated by the Tanzania National Malaria Control Program and started their distribution. Both study teams provided a net to all children who had presented for screening, regardless of whether or not they took part in the trial and to all new children who presented for screening.

## 4. ACKNOWLEDGEMENTS

The authors thank the following:

The children and their families and communities who generously participated in this trial, the study team members at each center, staff of the health facilities in the study areas, and the national and local government authorities for their guidance and support for the implementation of the trial.

The Independent Data Monitoring Committee: Malcolm Molyneux (Chair), Kate O'Brien, Kojo Koram, Juanita Hatcher, Tom Doherty, Zulfiqarali G Premji.

The Local Safety Monitors: Pietra Virginio, Esperança Sevene, Karim Manji, Firmina Mberesero, Grégoire Adzoda, Gyikua, Plange-Rhule, Sam Newton, Paul Mitei, Joel Okumu, James Alexander Berkley, Juliana Otieno, Dan Namarika, Grace Malenga.

INDEPTH Malaria Clinical Trial Alliance for research infrastructure development in participating centers. Bill and Melinda Gates Foundation: Jessica Milman, Regina Rabinovich, Gerard Cunningham and Richard Adegbola for their continued support and advice.

CEVAC: Geert Leroux-Roels, Frederic Clement and team for antibody testing.

Contract Laboratory Services, Johannesburg: Charlotte Ingram, Dyan Belonje, Elongo Fritz, Andrea Reijman.

Adriano Duse, University of the Witwatersrand Medical School, Johannesburg, for support to laboratory development; John Frean, National Health Laboratory Service, National Institute for Communicable Diseases, Johannesburg, South Africa for development of slide reading procedures and quality assurance; Ahmed Jusabani, Vera Manduku, Alicia Oller, Sidika Wambani for X-ray readings and trainings; Terrie Taylor, Clarissa Valim and the Severe Malaria in African Children Group (SMAC) for advice and data sharing and Robert Snow for sharing the malaria endemicity map and data.

Those listed below by study center who contributed in various ways to the trial:

Albert Schweitzer Hospital, Lambarene, Gabon: Marc Libessart, Akim Ayola Adegnika, Gregoire Adzoda, Tigani Madi, Dimitri Mbethe, Aurore Bouyoukou Hounkpatin, Tina Möller, Pamela Angoissa Minsoko, Rafika Zatra, Cosme Kokou, Safi Traore, Judith Kammer, Markus Gmeiner, Christof Schitke.

Centro de Investigação em Saúde de Manhiça, Manhiça, Mozambique: Augusto Nhabomba, Caterina Guinovart, Helder Bulo, Dirce Moreno, Arsénio Nhacolo, Charfudin Sacoor, Arnaldo Nhabanga, Delino Nhalungo, Carlota Dobano, Gemma Moncunil, Joe Campo.

Ifakara Health Institute, Bagamoyo, Tanzania: Klaus Reither, Mwajabu Loya, Said Omary, Hassan Mshinda, Charles Tarimo, Bakari Mwalim Bakari, Conrad Gwandu, Richard Kamata, Largi Fidelis Kyoro, Bagamoyo Community Advisory Board, Bagamoyo Village Health Care Workers.

Institut de Recherche en Science de la Santé, Nanoro, Burkina Faso: Biebo Bihoun, Issa Guiraud, Olivier Sombie, Berenger Kaboré, Blaise Gnoumou, Karim Derra, Hervé

Kpoda, Sylvia Kabré, Ida Ouédraogo, Eli Rouamba, Yacouba Barry, Salou Diallo, Levy Kaboré, Fatou Ouédraogo, François Kiendrebéogo, Palpouguini Lompo.

KEMRI/CDC Research and Public Health Collaboration, Kisumu, Kenya: Meredith McMorrow, Maria Oziemkowska, William Osoro, Tony Sang, John Vulule.

KEMRI - Walter Reed Project, Kombewa, Kenya: Maria Bovill, Louis Macareo, Samuel Wangowe, Philip Bondo, Philip Apamo, Thomas Tesot, Mary Akoth, Esther Oguk, Dorothy Caroline Mabunde, Linah Ooro.

KEMRI - Wellcome Trust Research Program, Kilifi, Kenya: Ken Awundo, Grace Dena, Salome Mongo, Amina Salim, Edward Mumbo, Godfrey Nyakaya, Grace Mwango, Monica Omondi, Catherine Kalu, Elizabeth Mwatata, Dorothy Mwachiro, Betty Kalama.

Kintampo Health Research Center, Kintampo, Ghana: Samuel Newton, Alex Manu, Samuel Agra, Mohammed Adams, Zuwera Yidana, Louisa Iddrisu, Elisha Adeniji, Stephen Apanga, Nicholas Amoako, John Gyapong, Dennis Adu-Gyasi, Seeba Amenga-Etego.

National Institute for Medical Research, Korogwe, Tanzania: Raimos Olomi, Robert Mongi, Beata Kimaro, Lincoln Malle, Zeno Manjulungu, Allvan Butichi, Andrew Kitua, Mwele Malecela, Rashid Said, Monica Billa, Paminus Lushino, Sharlote Mynah, Christian Mrimia, Claud Tesha, Phase 3 Study team.

School of Medical Sciences, Kumasi, Ghana: Anima Sarfo, Evelyn Anane-Sarpong, Pamela Martey, Jacqueline Assibey, Rita Fosu, Isaac Duodo, Patience Ayisi, Maame Pomaah, Ebenezer Lartey, Naana Brobby, Vivian Paintsil, Anthony Enimil, Frank

Prempeh, Lydia Badu, Sophia Opoku, Isaac Aguna, Pickett Frimpong, Lydia Appoh, Emmanuel Boakye, William Thompson, Phans Oduro, Vero Barnor, Ashura Bakari.

University of North Carolina Project, Lilongwe, Malawi: Agnes Zilore, Alice Mponya, Alice Banda, Alineti Tindi, Aubrey Mwantisi, Beauty Liwinga, Chalimba Lusewa, Charity Chavula, Cynthia Zulu, Chimwemwe Chawinga, Enock Mbota, Emmie Msika, Fadire Nyirenda, Felix Chanza, Gift Nyasulu, Gradwell Makulungwa, Hanleck Chimwaye, Ivy Kaliati, Jane Kilembe, Jeffrey Sinjani, Jimmy Tambala, John Ndipita, Joseph Manthalu, Joyce Mwese, Kenneth Chinthenga, Lenard Dandolo, Limbikani Chimndozi, Linda Chikopa, Mabvuto Chitema, Mabvuto Mpheula, Maureen Chunga, Mary Chiunda, Mary Munthali, Mathews Mukatipa, Mena Chawinga, Mercy Tsidya, Mydass Kamanga, Peter Maenje, Pluxidia Kanduku, Samuel Sibande, Sara Mwambakulu, Severiano Phakati, Sibongile Mafuleka, Veronica Banda, Veronica Tsamila, Zione Dembo, Enalla Mzembe, Tapiwa Tembo, Lydda Joyce Kandikole, Margaret Chigwenembe, Zenabu Mhango, Peter Kazembe, Charles Mwansambo and the Malaria Control Program of Malawi, Community Advisory Board.

Malaria Vaccine Initiative, United States: Santiago Ferro, Tonya Villafana, Jennifer O'Reilly, David Poland, Gretchen Mac Leod, Shannon Simpson.

GlaxoSmithKline, Belgium: Emelia Ferreira, Valérie Marichal, Ayline Yudhira, Geert Winnen, Jean-François Stallaert, Saartje Vansteenkiste, James Bringloe, Blanca Escobar, Christine Swysen, Brenda Okech, Cédric Bievelet, Bruno Knez, Dominique Verleyen, Stephan Leidinger, Shantala Rao, Subir Dey, Dirk Heerwegh, Lily Remacle, Sarah Bennis, Laurence Vigneron, Nerine Taitz, Dionne Smit, Viola-Marie Raubenheimer, Marie-Claude Dubois, Lode Schuerman, Conor Cahill, Pascale Vandoolaeghe, William

Mwatu, Aurélie Olivier for writing assistance, Marie Bayle and Jarno Jansen for publication management, and the Malaria Clinical and Project Teams.

## **5. GROUPS THAT HAVE CONTRIBUTED TO THE DELIVERY OF THIS TRIAL**

Writing group: Salim Abdulla (Chair), John Aponte, Brian Greenwood, Mary J Hamel, Didier Leboulleux, Amanda Leach, Marc Lievens, Patricia Njuguna, Aurelie Olivier, David Schellenberg, Marcel Tanner, Johan Vekemans.

Statistical working group: John Aponte, Marc Lievens (Chair), Bruno Mmbando, Ali Mohamed Ali, John Williamson, Yuxiao Tang.

Clinical Trials Partnership Committee: Salim Abdulla, Tsiri Agbenyega (Co-chair), Selidji Agnandji Todagbe, Daniel Ansong, Kwaku Poku Asante, Umberto D'Alessandro, Samwel Gesase, Brian Greenwood, Mary J. Hamel, Tinto Halidou, Irving Hoffman, Simon Kariuki, Peter Gottfried Kremsner, Didier Lapierre, Amanda Leach, Didier Leboulleux, Bertrand Lell, Christian Loucq, John Lusingu, Eusebio Macete, Kevin Marsh, Francis Martinson, Patricia Njuguna (Chair), Lucas Otieno, Walter Otieno, David Poland, Barbara Savarese, Jahit Sacarlal, Marcel Tanner, Johan Vekemans, Laurence Vigneron.

Clinical care group: Omari Abdul; Béatrice Peggy Abossolo; Samuel Adjei; Pauline Akoo; Selidji Todagbe Agnandji; Pedro Aide; Daniel Ansong; Kwaku Poku Asante; Quique Bassat; Harry Owusu Boateng; Roma Chilengi; Cornelia Conzelmann; Yannick Doucka; José Francisco Fernandes; Arnaud Flamen; Samwel Gesase; Jesse Gitaka; Ali Said Hamad; Mary J Hamel; Omar Juma; William Kaboré; Portia Kamthunzi; Christine Kerubo; Evans Kwara; Miguel Lanaspa; Bertrand Lell; Eusebio Macete; Francisca

Machera; Anangisye Malabeja; Barbara Gaelle Nfono Ondo Methogo; Rose Minja; Albans Msika; Vincent Muturi-Kioi; Tisungane Mvalo; Ali Mtoro; Otsyula Nekoye; Patricia Njuguna; Ruthendo Nkomo; Chris Odero; Ally Olotu; Martina Oneko; Kingsley Osei-Kwakye; Ruth Owusu-Ofori; Allan Otieno; Lucas Otieno; Walter Otieno; Larko Owusu; Theresa Rettig; Jahit Sacarlal; Nahya Salim; David Schellenberg; Mwanajaa Shomari; Solange Solmeheim Soulanoudjingar; Alma Sykes; Johan Vekemans (Chair).

## **6. DETAILED CONTRIBUTIONS TO THE STUDY**

Salim Abdulla, Tsiri Agbenyega, Selidji Agnandji Todagbe, Daniel Ansong, John Aponte, Kwaku Poku Asante, Quique Bassat, W. Ripley Ballou, Philip Bejon, Umberto D'Alessandro, Samwel Gesase, Brian Greenwood, Mary J. Hamel, Tinto Halidou, Irving Hoffman, David Jones, Simon Kariuki, Peter Gottfried Kremsner, Trudie Lang, Didier Lapierre, Amanda Leach, Bertrand Lell, Martha Lemnge, Christian Loucq, John Lusingu, Eusebio Macete, Kevin Marsh, Francis Martinson, Patricia Njuguna, Opokua Ofori-Anyinam, Ally Olotu, Lucas Otieno, Walter Otieno, Seth Owusu-Agyei, Barbara Savarese, Jahit Sacarlal, Marla Sillman, Laurence Slutsker, Marcel Tanner, and Johan Vekemans designed the study;

Omari Abdul, Salim Abdulla, Béatrice Peggy Abossolo, George Adjei, Samuel Adjei, Tsiri Agbenyega, Selidji Todagbe Agnandji, Alex Agyekum, Saumu Ahmed, Pedro Aide, Ali Mohammed Ali, Pauline Akoo, Agnes Akoth Onyango, Pedro Alonso, Daniel Ansong, Isaac Asante, Kwaku Poku Asante, Norbert Awino, Samuel Ayamba, Quique Bassat, John Bawa, Philip Bejon, Owusu Boahen, Harry Owusu Boateng, Myriam Bruls, Daniel Chandramohan, Roma Chilengi, Joseph Chintedza, Nelecy Chome, Cornelia Conzelmann, David Dosoo, Yannick Doucka, Chris Drakeley, José Francisco Fernandes,

Arnaud Flamen, Samwel Gesase, Jesse Gitaka, Stacey Gondi, Robert Tinga Guiguemdé, Ali Said Hamad, Mary J. Hamel, Saadou Issifou, David Jones, Erik Jongert, Omar Juma, Allan Jumbe, William Kaboré, Portia Kamthunzi, Simon Kariuki, Kingsley Kayan, Christine Kerubo, Peter Gottfried Kremsner, Hassan Kilavo, Evans Kwara, Miguel Lanaspa, Trudie Lang, Kayla F. Laserson, Bertrand Lell, Martha Lemnge, Edwin Liheluka, John Lusingu, Eusébio Macete, Francisca Machera, Coline Mahende, Charity Maingi, Anangisye Malabeja, Sofia Mandjate, Kevin Marsh, Francis Martinson, Rose Minja, Benjamin Mordmüller, Maxmillian Mpina, Albans Msika, Ali Mtoro, Vincent Muturi-Kioi, Tisungane Mvalo, Grace Mwangoka, Otsyula Nekoye, Barbara Gaelle Nfono Ondo Methogo, Arlindo Nhamuave, Patricia Njuguna, Ruthendo Nkomo, Dalitso Nyakuipa, Jackton Omoto, Chris Odero, Bernhards Ogutu, Ally Olotu, Martina Oneko, Kingsley Osei-Kwakye, Allan Otieno, Kephass Otieno, Lucas Otieno, Walter Otieno, Jean Bosco Ouédraogo, Sayouba Ouédraogo, Victorine Owira, Larko Owusu, Seth Owusu-Agyei, Ruth Owusu-Ofori, Norbert Peshu, Diana Quelhas, Theresa Rettig, Jahit Sacarlal, David Sambian, Nahya Salim, Yara Sandrine, Mwanajaa Shomari, Kafuruki Shubis, Hermann Sorgho, Solange Solmeheim Soulanoudjingar, Alma Sykes, Justice Sylverken, Marc Christian Tahita, Thor Theander, Halidou Tinto, Benjamin Tsofa, Alwisa Martin Urassa, Innocent Valea, and Ruth Wasuna gathered the data;

John Aponte, Marc Lievens, Ali Mohamed Ali, and John Williamson developed the analysis plan of the data;

John Aponte and Marc Lievens vouch for the data and analysis;

Salim Abdulla, Tsiri Agbenyega, Selidji Agnandji Todagbe, Ali Mohamed Ali, Daniel Ansong, John Aponte, Terrell Carter, Joe Cohen, Umberto D'Alessandro, Samwel

Gesase, Brian Greenwood, Yolanda Guerra, Mary J. Hamel, Tinto Halidou, Irving Hoffman, Erik Jongert, Simon Kariuki, Peter Gottfried Kremsner, Didier Lapierre, Amanda Leach, Didier Leboulleux, Bertrand Lell, Marc Lievens, Christian Loucq, Eusebio Macete, Kevin Marsh, Francis Martinson, Patricia Njuguna, Bernhards Ogutu, Lucas Otieno, Walter Otieno, Afiya Radford, Barbara Savarese, Jahit Sacarlal, David Schellenberg, Laurence Slutsker, Marcel Tanner, Preeti Vansadia, Johan Vekemans, and John Williamson interpreted the results;

Salim Abdulla, John Aponte, Brian Greenwood, Mary J Hamel, Didier Leboulleux, Amanda Leach, Marc Lievens, Patricia Njuguna, David Schellenberg, Marcel Tanner, and Johan Vekemans wrote the paper;

All authors decided to publish the paper, reviewed all manuscript drafts, and approved the final version of the manuscript.

## **7. CONFLICTS OF INTEREST**

The study was sponsored by GSK, the vaccine developer and manufacturer, and funded by both GSK Biologicals and the MVI. All centers declare receiving a grant from MVI for running the trial. Author travel and accommodation related to this trial were financed by MVI. GlaxoSmithKline Biologicals received a grant from MVI to run the trial. MVI received a grant from the Bill and Melinda Gates Foundation to run this trial and to compensate MVI authors for trial-related travel. Other conflicts of interest are disclosed below and in forms available with the full text of this article at [NEJM.org](http://NEJM.org).

Pedro Aide declares having received a grant from GSK Biologicals as a contribution to post-graduate training, John Aponte has received for the center consultancy fees from

GSK Biologicals for membership of the DSMB Board for a pneumococcal vaccine.

Patricia Njuguna, Kevin Marsh, Pauline Akoo, Philip Bejon, Charity Maingi, Ally Olotu, Trudie Lang, Jesse Gitaka, Christine Kerubo, and Norbert Peshu declare that their institution has received grants from MVI for other malaria studies. Philip Bejon declares having received compensation for travel and accommodation related to other malaria studies. Roma Chilengi and Benjamin Tsofa declare that their institution receives infrastructural support from MVI. Brian Greenwood declares that the London School of Hygiene and Tropical Medicine, at which he is employed, receives a grant from GSK for work on a pneumococcal protein vaccine. John Lusingu, Samwel Gesase, Anangisy Malabeja, Omari Abdul, Hassan Kilavo, Coline Mahende, Edwin Liheluka, and Martha Lemnge declare that their institution receives additional infrastructural support from MVI for this trial. John Lusingu declares receiving a salary supplement from MVI for conducting this trial, and his institution has received funds from MVI for GCLP training to staff conducting this clinical trial and to strengthen the infrastructure. John Lusingu declares having received consultancy fees from the Task Force on Immunization in the WHO-AFRO region outside the submitted work, and having grants pending from DANIDA-ENRECA and AMANET. AInstitut de Recherche en Science de la Santé, Nanoro, Burkina Faso

AAAll GSK authors are employed by GSK Biologicals. W. Ripley Ballou, Joe Cohen, Didier Lapierre, Amanda Leach, Opokua Ofori-Anyinam and Johan Vekemans have shares/stock options in GSK. W. Ripley Ballou and Joe Cohen declare that they have patents assigned to GSK.

Terrell Carter, Didier Leboulleux, Christian Loucq, Afiya Radford, Barbara Savarese, Marla Sillman, and Preeti Vansadia are employees at PATH-MVI. David Schellenberg is

employed by the London School of Hygiene and Tropical Medicine, and his consultancy activities for MVI are funded as a grant to the LSHTM by MVI. Christian Loucq holds GSK shares.

## 8. REFERENCES

1. Leach A, Vekemans J, Lievens M, et al. Design of a phase III multicenter trial to evaluate the efficacy of the RTS,S/AS01 malaria vaccine in children across diverse transmission settings in Africa. *Malar J* 2011; 10:224.
2. ICH Harmonised Tripartite Guideline. Good Clinical Practice: Consolidated Guideline. International Conference on Harmonization of Technical Requirements for Registration of Pharmaceuticals for Human Use (ICH). 1996. Section 6 “Clinical Trial Protocol and Protocol Amendment(s)” and Section 8 “Essential Documents for the Conduct of a Clinical Trial.”
3. WHO. Pocket book of Hospital care for children; Guidelines for the management of common illnesses with limited resources. World Health Organization, 2005. (Accessed April 18, 2011 at <http://whqlibdoc.who.int/publications/2005/9241546700.pdf>)
4. Cohen J, Nussenzweig V, Nussenzweig R, Vekemans J, Leach A. From the circumsporozoite protein to the RTS, S/AS candidate vaccine. *Hum Vacc* 2010;6:90-96.
5. Bonhoeffer J, Menkes J, Gold MS, et al. Generalized convulsive seizure as an adverse event following immunization: case definition and guidelines for data collection, analysis and presentation. *Vaccine* 2004;22:557-562.
6. WHO. Verbal Autopsy Standards: ascertaining and attributing cause of death. Geneva: World Health Organization, 2007. (Accessed April 22, 2011 at <http://www.who.int/whosis/mort/verbalautopsystandards/en/>)

7. Vekemans J, Marsh K, Greenwood B et al. Assessment of severe malaria in a multicentre, phase III, RTS,S/AS01 malaria candidate vaccine trial: case definition, standardization of data collection and patient care. *Malar J* 2011;10:221.
8. Molyneux ME, Taylor TE, Wirima JJ, Borgstein A. Clinical features and prognostic indicators in paediatric cerebral malaria: a study of 131 comatose Malawian children. *Q J Med* 1989;71:441-59.
9. Berkley JA, Ross A, Mwangi I et al. Prognostic indicators of early and late death in children admitted to district hospital in Kenya: cohort study. *BMJ* 2003;326:361-366.
10. WHO. Standardization of interpretation of chest radiographs for the diagnosis of pneumonia in children. World Health Organization, Geneva, 2001. (Accessed April 27, 2011 at <http://www.who.int/vaccines-documents/DocsPDF01/www616.pdf>)
11. Cogill, B. Anthropometric Indicators Measurement Guide. Food and Nutrition Technical Assistance Project, Academy for Educational Development. Washington, DC, 2003.
12. Swysen C, Vekemans J, Bruls M, et al. Development of standardized laboratory methods and quality processes for a phase III study of the RTS,S/AS01 candidate malaria vaccine. *Malar J* 2011;10:223.
13. Mahon CR, Manuselis G. Textbook of Diagnostic Microbiology. 2nd Edition. Philadelphia, USA: Saunders, 2000.

14. Winn W, Allen S, Janda W, et al. Koneman's Color Atlas and Textbook of Diagnostic Microbiology. 6th ed. Philadelphia, USA: Lippincott Williams and Wilkins, 2006.
15. WHO, The WHO Young Infants Study Group. Bacterial etiology of serious infections in young infants in developing countries: results of a multicentre study. *Pediatr Infect Dis J* 1999;18:S17-S22.
16. Berkley JA, Mwangi I, Ngetsa CJ, et al. Diagnosis of acute bacterial meningitis in children at a district hospital in sub-Saharan Africa. *Lancet* 2001;357:1753-57.
17. Macete E, Scarlal J, Aponte JJ, et al. Evaluation of two formulations of adjuvanted RTS,S malaria vaccine in children aged 3-5 years living in a malaria-endemic region of Mozambique, a Phase I/IIb randomized double-blind bridging trial. *Trials* 2007; 26 ;8:11.
18. Hay SI, Guerra CA, Gething PW et al. A World Malaria Map: *Plasmodium falciparum* Endemicity in 2007. *PLoS Med* 2009;6:e1000048.

## 9. SUPPLEMENTARY TABLES AND FIGURES

Supplementary figure 1. Study sites and malaria endemicity

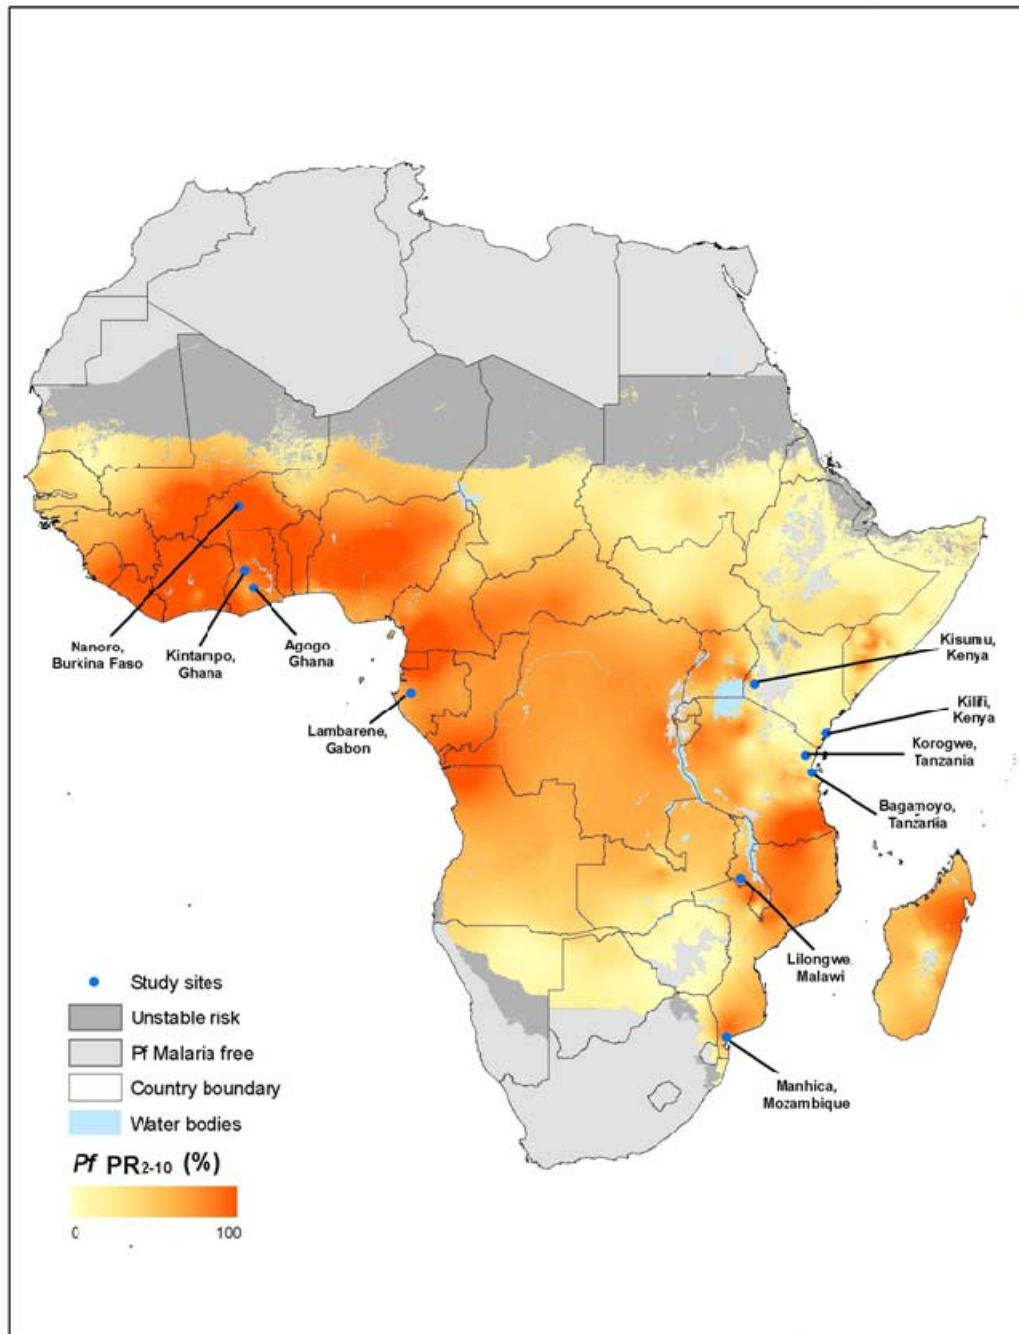

Adapted from Hay et al, 2009.<sup>18</sup> The location of each participating center has been added to this previously published map showing the spatial distribution of *P. falciparum* malaria endemicity. Two centers are located in Kisumu, Kenya. The data are the model-based geostatistical point estimates of the annual mean *P. falciparum* parasite rate age-standardized for 2-10 years for 2007 within the stable spatial limits of *P. falciparum* malaria transmission, displayed as a continuum of yellow to red from 0%–100% (see map legend). The rest of the land area was defined as unstable risk (medium grey areas) or no risk (light grey). Nanoro, Burkina Faso has high seasonal malaria transmission.

Supplementary figure 2. Study design

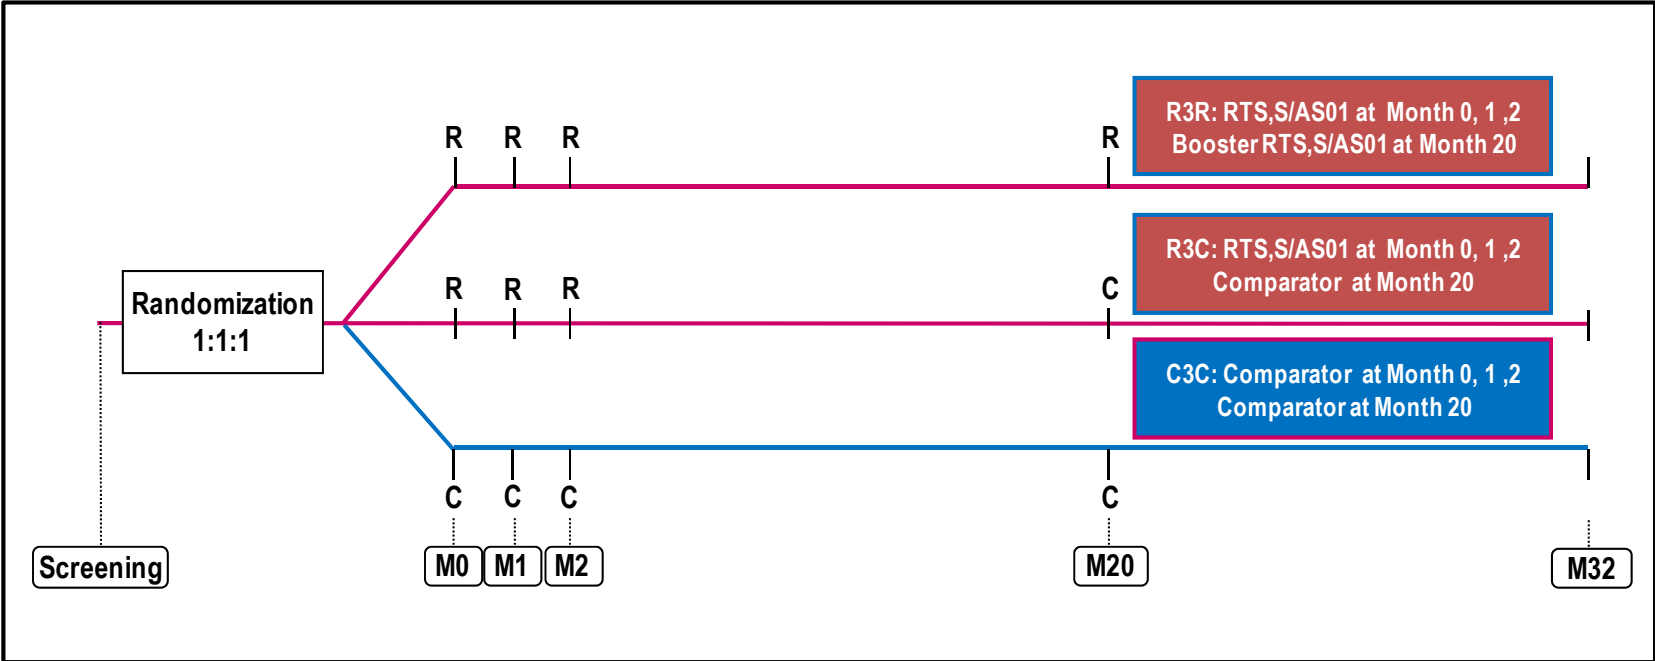

M = Study Month

**Supplementary figure 3. Incidence of solicited local and general adverse events reported during the 7-day post vaccination period following each dose in children 5-17 months of age at enrollment (ITT)**

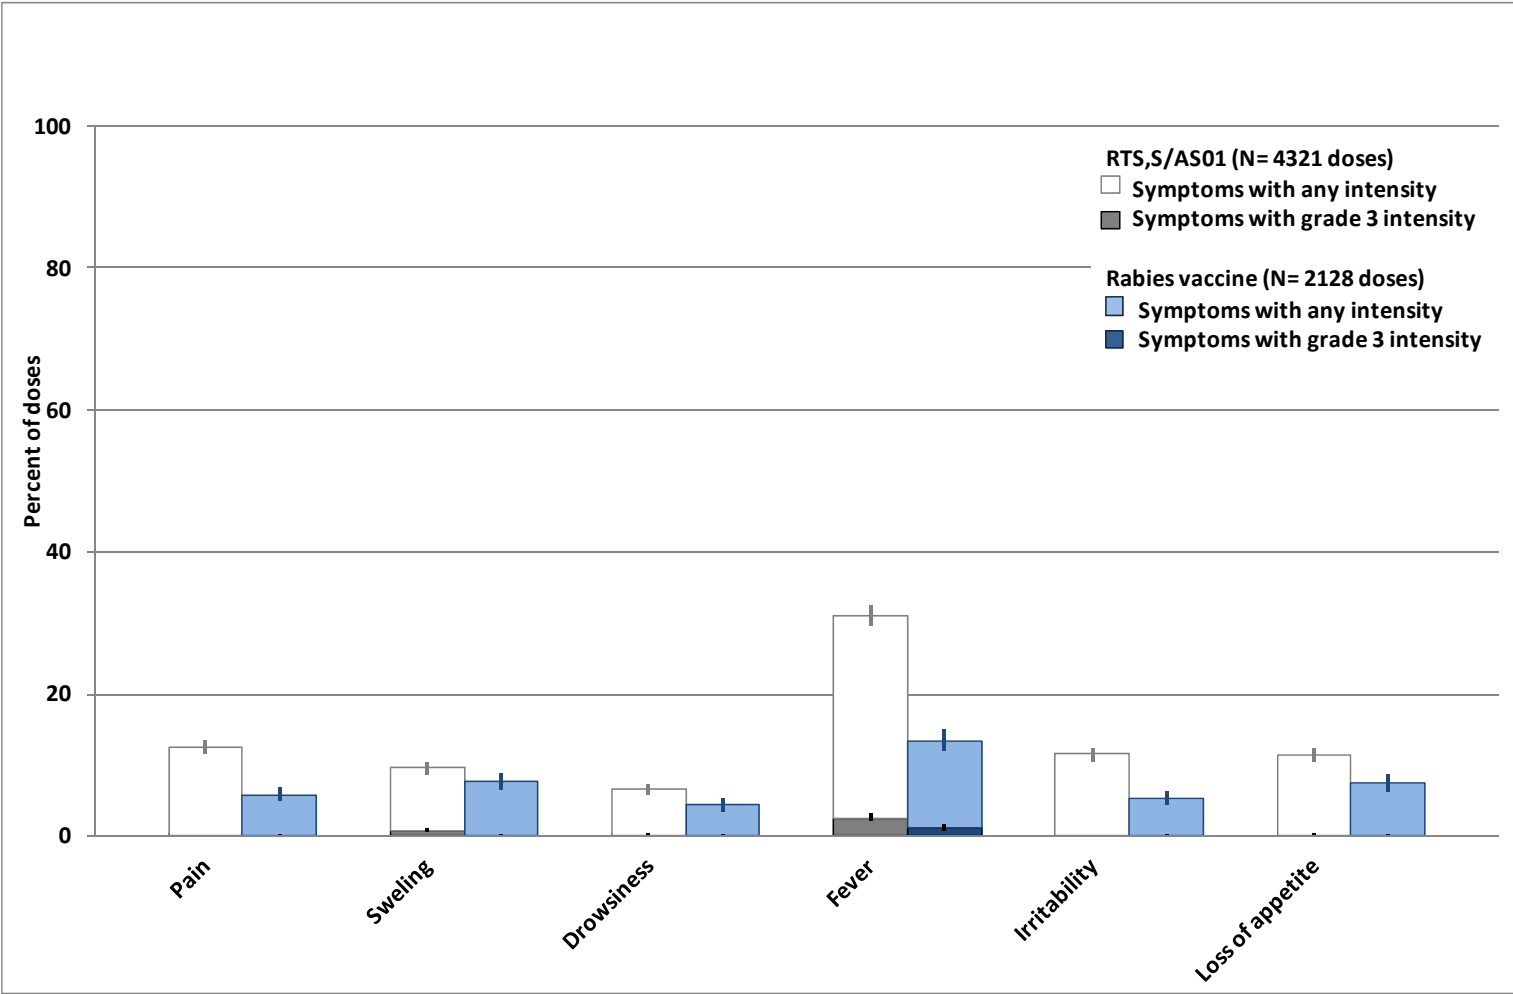

Solicited adverse events during the 7-day post-vaccination period were recorded and analyzed only in the first 200 subjects enrolled at each site.

**Supplementary figure 4. Reverse cumulative distribution curve for Anti-CS antibody titers in children 5-17 months at 1 month post-Dose 3 (ATP)**

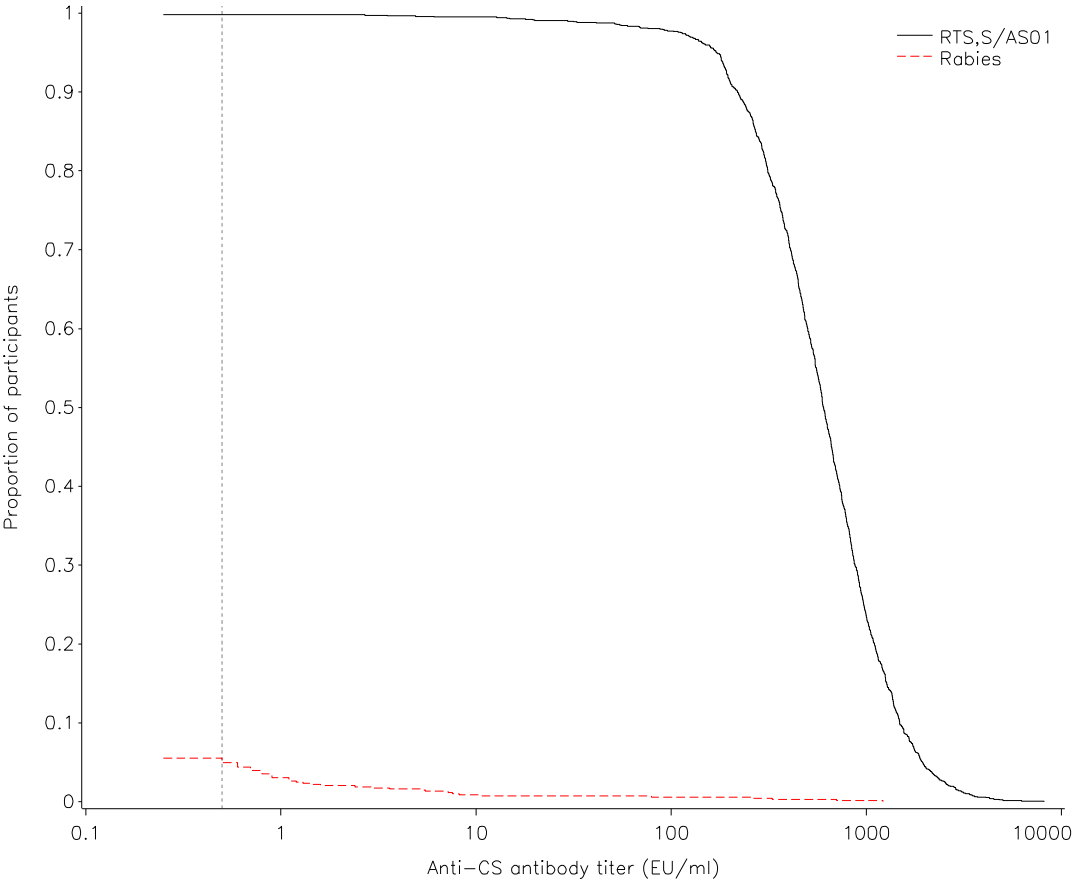

**Supplementary table 1. List of Ethic Committees and Review Boards**

| <b>Study Sites</b>                                                 | <b>Ethics Review Body</b>                                                                                               |
|--------------------------------------------------------------------|-------------------------------------------------------------------------------------------------------------------------|
| Institut de Recherche en Science de la Santé, Nanoro, Burkina Faso | Western Institutional Review Board (WIRB)                                                                               |
|                                                                    | Comité d’Ethique Institutionnel du Centre Muraz (Institutional Ethics Committee of Muraz Center)                        |
|                                                                    | Comite d’Ethique pour la Recherche en Santé (Ethics Committee for Health Research)                                      |
| Albert Schweitzer Hospital, Lambarene, Gabon                       | Western Institutional Review Board (WIRB)                                                                               |
|                                                                    | Comité d’Ethique Régional Indépendant de Lambaréné (CERIL) (Independent Regional Ethics Committee of Lambaréné)         |
|                                                                    | Comité National d’Ethique pour la Recherche (National Ethics Committee for Research The Board)                          |
| School of Medical Sciences, Kumasi (Agogo), Ghana                  | Western Institutional Review Board (WIRB)                                                                               |
|                                                                    | Ghana Health Service (GHS) Ethical Review Committee (ERC) Research and Development Division                             |
|                                                                    | Committee on Human Research Publication and Ethics (CHRPE)                                                              |
| Kintampo Health Research Center, Kintampo, Ghana                   | Western Institutional Review Board (WIRB)                                                                               |
|                                                                    | Kintampo Health Research Centre (KHRC) Institutional Ethics Committee (IEC)                                             |
|                                                                    | London School of Hygiene and Tropical Medicine Ethic Committee                                                          |
|                                                                    | Ghana Health Service (GHS) Ethical Review Committee (ERC) Research and Development Division                             |
| KEMRI - Walter Reed Project, Kombewa, Kenya                        | Western Institutional Review Board (WIRB)                                                                               |
|                                                                    | Kenya Medical Research Institute (KEMRI) National Ethics Review Committee                                               |
|                                                                    | Walter Reed Army Institute of Research (WRAIR) IRB                                                                      |
| KEMRI - Wellcome Trust Research Program, Kilifi, Kenya             | Western Institutional Review Board (WIRB)                                                                               |
|                                                                    | Kenya Medical Research Institute (KEMRI) National Ethics Review Committee                                               |
| KEMRI/CDC Research and Public Health Collaboration, Siaya, Kenya   | Western Institutional Review Board (WIRB)                                                                               |
|                                                                    | Kenya Medical Research Institute (KEMRI) National Ethics Review Committee                                               |
|                                                                    | Centers for Disease Control and Prevention(CDC) – IRB                                                                   |
| University of North Carolina Project, Lilongwe, Malawi             | Western Institutional Review Board (WIRB)                                                                               |
|                                                                    | National Health Sciences Research Committee                                                                             |
|                                                                    | Office of Human Research Ethics                                                                                         |
| Centro de Investigação em Saúde de Manhiça, Manhiça, Mozambique    | Western Institutional Review Board (WIRB)                                                                               |
|                                                                    | Comitè Etic Investigació Clínica (Hospital Clinic (Barcelona University) Ethics Committee)                              |
|                                                                    | Comité Nacional de Bioética para a Saúde (National Bioethical Health Committee, Mozambique)                             |
| Ifakara Health Institute, Bagamoyo, Tanzania                       | Western Institutional Review Board (WIRB)                                                                               |
|                                                                    | National Institute for Medical Research (NIMR)                                                                          |
|                                                                    | Ethikkommission beider Basel (EKBB) (Ethics Committee of the Swiss Tropical Institute)                                  |
|                                                                    | Ifakara Health Institute research training services - IRB                                                               |
| National Institute of Medical Research, Korogwe, Tanzania          | Western Institutional Review Board (WIRB)                                                                               |
|                                                                    | London School of Hygiene and Tropical Medicine                                                                          |
|                                                                    | Tanzania Medical Research Coordinating Committee (MRCC) operating within National Institute for Medical Research (NIMR) |
|                                                                    | The Danish National Committee on Biomedical Research Ethics                                                             |

## Supplementary table 2. Case definitions of severe malaria

|                             |                                                                     |                                                                                                                                                                                                                                                                                                                                                                                                                                                                                                                                                                                                                                                                                |
|-----------------------------|---------------------------------------------------------------------|--------------------------------------------------------------------------------------------------------------------------------------------------------------------------------------------------------------------------------------------------------------------------------------------------------------------------------------------------------------------------------------------------------------------------------------------------------------------------------------------------------------------------------------------------------------------------------------------------------------------------------------------------------------------------------|
| <b>Primary definition</b>   | <i>P. falciparum</i> > 5000 parasites per $\mu$ L                   | <b>AND</b> with one or more marker of disease severity: <ul style="list-style-type: none"> <li>• Prostration</li> <li>• Respiratory distress</li> <li>• Blantyre score <math>\leq 2</math></li> <li>• Seizures 2 or more</li> <li>• Hypoglycemia &lt; 2.2 mmol/L</li> <li>• Acidosis BE <math>\leq -10.0</math> mmol/L</li> <li>• Lactate <math>\geq 5.0</math> mmol/L</li> <li>• Anemia &lt; 5.0 g/dL</li> </ul> <b>AND</b> without diagnosis of a co-morbidity: <ul style="list-style-type: none"> <li>• Radiographically proven pneumonia</li> <li>• Meningitis on CSF examination</li> <li>• Positive blood culture</li> <li>• Gastroenteritis with dehydration</li> </ul> |
| <b>Secondary definition</b> | <i>P. falciparum</i> > 5000 parasites per $\mu$ L with co-morbidity | with one or more marker of disease severity                                                                                                                                                                                                                                                                                                                                                                                                                                                                                                                                                                                                                                    |

**Prostration:** in an acutely sick child, the inability to perform previously-acquired motor function: in a child previously able to stand, inability to stand; in a child previously able to sit, inability to sit and in a very young child, inability to suck.

**Respiratory distress:** lower chest wall indrawing or abnormally deep breathing.

**2 or more seizures:** occurring in the total time period including 24 hours prior to admission, the emergency room and the hospitalization.

**Radiographically proven pneumonia:** a consolidation or pleural effusion defined per protocol on a chest x-ray taken within 72 hours of admission.

**Meningitis on CSF examination:** WC  $\geq 50 \times 10^6$ /L or positive culture of compatible organism or latex agglutination positive for Hib, pneumococci or meningococci.

**Gastroenteritis with dehydration:** history of 3 or more loose or watery stools in previous 24 hours and an observed watery stool with decreased skin turgor (> 2 seconds for skin to return following skin pinch).

**Positive blood culture:** defined per protocol on a blood culture taken within 72 hours of admission.

### **Supplementary table 3. Algorithm for the evaluation of a hospital admission as a potential case of severe malaria**

---

For all acute hospital admissions (i.e. except planned admissions for medical investigation/care or elective surgery and trauma admissions), a blood sample was taken for evaluation of:

- Malaria parasite density
- Blood culture
- Hemoglobin
- Blood glucose, lactate and base excess

---

#### **Lumbar Puncture was indicated by the presence of:**

- Seizure except simple febrile seizure (defined as associated with fever, lasts for 5 minutes or less, generalized as opposed to focal, not followed by transient or persistent neurological abnormalities, occurring in a child  $\geq 6$  months of age, with full recovery within 1 hour)
- Blantyre Coma Score  $< 5$  (children  $\leq 9$  months of age  $< 4$  [in association with best motor response of 1]) 8
- Prostration in child  $< 3$  year of age
- Meningism/stiff neck/bulging fontanelle
- Clinician's judgment

---

#### **Chest X-ray (CXR) was indicated by the presence of:**

- Tachypnea ( $\geq 50$  breaths per minute in a child  $< 1$  year and  $\geq 40$  breaths per minute in a child  $\geq 1$  year) 9
  - Lower chest wall indrawing
  - Abnormally deep breathing
  - Clinician's judgement
-

**Supplementary table 4. Grading of solicited adverse events (AEs)**

| <b>Adverse Event</b>       | <b>Intensity grade</b> | <b>Parameter</b>                                          |
|----------------------------|------------------------|-----------------------------------------------------------|
| Pain at injection site     | 0                      | Absent                                                    |
|                            | 1                      | Minor reaction to touch                                   |
|                            | 2                      | Cries/protests on touch                                   |
|                            | 3                      | Cries when limb is moved/spontaneously painful            |
| Swelling at injection site | 0                      | Absent                                                    |
|                            | 1                      | <5 mm                                                     |
|                            | 2                      | 5-20 mm                                                   |
|                            | 3                      | >20 mm                                                    |
| Redness at injection site  | 0                      | Absent                                                    |
|                            | 1                      | <5 mm                                                     |
|                            | 2                      | 5-20 mm                                                   |
|                            | 3                      | >20 mm                                                    |
| Fever                      | 0                      | <37.5°C                                                   |
|                            | 1                      | 37.5-38°C                                                 |
|                            | 2                      | >38-39°C                                                  |
|                            | 3                      | >39°C                                                     |
| Irritability/Fussiness     | 0                      | Behavior as usual                                         |
|                            | 1                      | Crying more than usual/ no effect on normal activity      |
|                            | 2                      | Crying more than usual/ interferes with normal activity   |
|                            | 3                      | Crying that cannot be comforted/ prevents normal activity |
| Drowsiness                 | 0                      | Behavior as usual                                         |
|                            | 1                      | Drowsiness easily tolerated                               |
|                            | 2                      | Drowsiness that interferes with normal activity           |
|                            | 3                      | Drowsiness that prevents normal activity                  |
| Loss of appetite           | 0                      | Appetite as usual                                         |
|                            | 1                      | Eating less than usual/ no effect on normal activity      |
|                            | 2                      | Eating less than usual/ interferes with normal activity   |
|                            | 3                      | Not eating at all                                         |

**Supplementary table 5a. First 6000 children aged 5-17 months enrolled, number by site**

|             | ATP                    |      |                            |      | ITT                    |      |                            |      |
|-------------|------------------------|------|----------------------------|------|------------------------|------|----------------------------|------|
|             | RTS,S/AS01<br>N = 2830 |      | Rabies vaccine<br>N = 1466 |      | RTS,S/AS01<br>N = 3997 |      | Rabies vaccine<br>N = 2003 |      |
| Study sites | n                      | %    | n                          | %    | N                      | %    | n                          | %    |
| Agogo       | 366                    | 12.9 | 193                        | 13.2 | 393                    | 9.8  | 200                        | 10.0 |
| Bagamoyo    | 353                    | 12.5 | 185                        | 12.6 | 467                    | 11.7 | 237                        | 11.8 |
| Kilifi      | 308                    | 10.9 | 157                        | 10.7 | 365                    | 9.1  | 187                        | 9.3  |
| Kintampo    | 336                    | 11.9 | 172                        | 11.7 | 372                    | 9.3  | 191                        | 9.5  |
| Kombewa     | 595                    | 21.0 | 306                        | 20.9 | 652                    | 16.3 | 325                        | 16.2 |
| Korogwe     | 0                      | 0    | 0                          | 0    | 0                      | 0    | 0                          | 0    |
| Lambarene   | 182                    | 6.4  | 99                         | 6.8  | 244                    | 6.1  | 120                        | 6.0  |
| Lilongwe    | 87                     | 3.1  | 52                         | 3.5  | 189                    | 4.7  | 90                         | 4.5  |
| Manhica     | 0                      | 0.0  | 0                          | 0.0  | 664                    | 16.6 | 336                        | 16.8 |
| Nanoro      | 141                    | 5.0  | 60                         | 4.1  | 143                    | 3.6  | 61                         | 3.0  |
| Siaya       | 462                    | 16.3 | 242                        | 16.5 | 508                    | 12.7 | 256                        | 12.8 |

N = number of subjects

n = number of subjects in a given category

% = n / Number of subjects with available results x 100

**Supplementary table 5b. Number of children aged 6 weeks - 17 months enrolled by site**

|                    | ATP                    |      |                             |      | ITT                     |      |                             |      |
|--------------------|------------------------|------|-----------------------------|------|-------------------------|------|-----------------------------|------|
|                    | RTS,S/AS01<br>N = 8597 |      | Control vaccine<br>N = 4364 |      | RTS,S/AS01<br>N = 10307 |      | Control vaccine<br>N = 5153 |      |
| <b>Study sites</b> | n                      | %    | n                           | %    | n                       | %    | n                           | %    |
| Agogo              | 795                    | 9.2  | 417                         | 9.6  | 858                     | 8.3  | 430                         | 8.3  |
| Bagamoyo           | 967                    | 11.2 | 483                         | 11.1 | 1138                    | 11.0 | 567                         | 11.0 |
| Kilifi             | 528                    | 6.1  | 273                         | 6.3  | 597                     | 5.8  | 307                         | 6.0  |
| Kintampo           | 803                    | 9.3  | 396                         | 9.1  | 889                     | 8.6  | 444                         | 8.6  |
| Kombewa            | 1001                   | 11.6 | 516                         | 11.8 | 1089                    | 10.6 | 542                         | 10.5 |
| Korogwe            | 951                    | 11.1 | 478                         | 11.0 | 1006                    | 9.8  | 499                         | 9.7  |
| Lambarene          | 527                    | 6.1  | 261                         | 6.0  | 628                     | 6.1  | 302                         | 5.9  |
| Lilongwe           | 865                    | 10.1 | 442                         | 10.1 | 1086                    | 10.5 | 540                         | 10.5 |
| Manhica            | 381                    | 4.4  | 188                         | 4.3  | 1087                    | 10.5 | 550                         | 10.7 |
| Nanoro             | 832                    | 9.7  | 425                         | 9.7  | 850                     | 8.2  | 431                         | 8.4  |
| Siaya              | 947                    | 11.0 | 485                         | 11.1 | 1079                    | 10.5 | 541                         | 10.5 |

N = number of subjects

n = number of subjects in a given category

% =  $n / \text{Number of subjects with available results} \times 100$

**Supplementary table 6. Malaria prevention in the first 6000 children aged 5-17 months at enrollment at 14 months post Dose-1 (ITT)**

|                                              |                      | RTS,S/AS01<br>N = 3997 |      | Rabies vaccine<br>N = 2003 |      |
|----------------------------------------------|----------------------|------------------------|------|----------------------------|------|
| Characteristics                              | Categories           | n                      | %    | n                          | %    |
| Bednet use, measured at Month 14 post Dose-1 | ITN no holes         | 1473                   | 42.9 | 736                        | 41.3 |
|                                              | ITN holes            | 1116                   | 32.5 | 590                        | 33.1 |
|                                              | Untreated w/o holes  | 130                    | 3.8  | 64                         | 3.6  |
|                                              | Untreated with holes | 97                     | 2.8  | 60                         | 3.4  |
|                                              | No bednet            | 619                    | 18.0 | 331                        | 18.6 |
|                                              | Missing              | 562                    | -    | 222                        | -    |
| Indoor residual spraying                     | N                    | 3173                   | 92.1 | 1651                       | 92.6 |
|                                              | Y                    | 274                    | 7.9  | 131                        | 7.4  |
|                                              | Missing              | 550                    | -    | 221                        | -    |

N = number of subjects

n = number of subjects in a given category

% =  $n / \text{Number of subjects with available results} \times 100$

ITN no holes = insecticide treated bednet with no hole large enough to admit three fingers

ITN holes = insecticide treated bednet with at least one hole large enough to admit three fingers

Untreated w/o holes = untreated bednet with no hole large enough to admit three fingers

Untreated with holes = untreated bednet with at least one hole large enough to admit three fingers

**Supplementary table 7. composition of the cohort that included both the younger and older age-categories**

| <b>Cohort of analysis</b> | <b>Number of children per age category</b> | <b>Duration of follow-up post dose-3</b>                                           | <b>Reported efficacy post dose 3</b>                                                                                                         |
|---------------------------|--------------------------------------------|------------------------------------------------------------------------------------|----------------------------------------------------------------------------------------------------------------------------------------------|
| 6000                      | 6000 5-17 months                           | All subjects followed to 12 months post dose-3 (or death or withdrawal)            | <b>12 months per subject</b>                                                                                                                 |
| 15460                     | 8923 5-17 months<br>6537 6-12 weeks        | All subjects followed to 31st May (or booster at 18 months or death or withdrawal) | Overall: <b>11 months average</b> range (0 - 22)<br>5-17 months: 16 months average range (0-22)<br>6-12 weeks: 7 months average range (0-15) |

**Supplementary table 8a. Baseline characteristics in the first 6000 children aged 5-17 months at enrollment (ITT)**

|                                           |           | <b>RTS,S/AS01<br/>N = 3997</b> | <b>Rabies vaccine<br/>N = 2003</b> |
|-------------------------------------------|-----------|--------------------------------|------------------------------------|
| Age in months at first dose [5-17 months] | Mean ± SD | 10.9 ± 3.8                     | 10.9 ± 3.7                         |
| Male Gender                               | n (%)     | 1965 (49.2)                    | 980 (48.9)                         |
| Distance outpatient [km]                  | Mean ± SD | 3.4 ± 4.2                      | 3.6 ± 4.7                          |
| Distance inpatient [km]                   | Mean ± SD | 12.7 ± 11.3                    | 12.8 ± 11.2                        |
| Height for age z-score                    | Mean ± SD | -1.1 ± 1.4                     | -1.1 ± 1.3                         |
| Weight for age z-score                    | Mean ± SD | -0.8 ± 1.2                     | -0.8 ± 1.1                         |
| Hemoglobin [g/dL]                         | Mean ± SD | 9.8 ± 1.4                      | 9.8 ± 1.3                          |
| Moderate anemia [Hb <8g/dL]               | n (%)     | 380 (9.5)                      | 173 (8.6)                          |

N = number of subjects

n = number of subjects in a given category

SD = Standard deviation

None of the baseline characteristics differed by group ( $p > 0.05$ )

**Supplementary table 8b. Baseline characteristics in children aged 6 weeks - 17 months at enrollment (ITT)**

|                                           |           | <b>RTS,S/AS01<br/>N = 10307</b> | <b>Control vaccine<br/>N = 5153</b> |
|-------------------------------------------|-----------|---------------------------------|-------------------------------------|
| Age in months at first dose [5-17 months] | N         | 5949                            | 2974                                |
|                                           | Mean ± SD | 10.6 ± 3.8                      | 10.6 ± 3.7                          |
| Age in weeks at first dose [6-12 weeks]   | N         | 4358                            | 2179                                |
|                                           | Mean ± SD | 7.1 ± 1.4                       | 7.1 ± 1.4                           |
| Male Gender                               | n (%)     | 5216 (50.6)                     | 2550 (49.5)                         |
| Distance outpatient [km]                  | Mean ± SD | 4.2 ± 4.5                       | 4.2 ± 4.6                           |
| Distance inpatient [km]                   | Mean ± SD | 14.2 ± 12.4                     | 13.9 ± 12.0                         |
| Height for age z-score                    | Mean ± SD | -1.2 ± 1.4                      | -1.2 ± 1.3                          |
| Weight for age z-score                    | Mean ± SD | -0.7 ± 1.2                      | -0.7 ± 1.1                          |
| Hemoglobin [g/dL]                         | Mean ± SD | 10.3 ± 1.6                      | 10.3 ± 1.6                          |
| Moderate anemia [Hb <8g/dL]               | n (%)     | 668 (6.5)                       | 345 (6.7)                           |

N = number of subjects

n = number of subjects in a given category

SD = Standard deviation

None of the baseline characteristics differed by group ( $p > 0.05$ )

**Supplementary table 8c. Baseline characteristics in the first 6000 children aged 5-17 months at enrollment (ATP)**

|                                           |           | <b>RTS,S/AS01<br/>N = 2830</b> | <b>Rabies vaccine<br/>N = 1466</b> |
|-------------------------------------------|-----------|--------------------------------|------------------------------------|
| Age in months at first dose [5-17 months] | Mean ± SD | 10.9 ± 3.8                     | 10.9 ± 3.7                         |
| Male Gender                               | n (%)     | 1417 (50.1)                    | 742 (50.6)                         |
| Distance outpatient [km]                  | Mean ± SD | 3.7 ± 4.6                      | 3.9 ± 5.2                          |
| Distance inpatient [km]                   | Mean ± SD | 11.8 ± 11.7                    | 11.9 ± 11.7                        |
| Height for age z-score                    | Mean ± SD | -1.1 ± 1.3                     | -1.1 ± 1.3                         |
| Weight for age z-score                    | Mean ± SD | -0.8 ± 1.2                     | -0.8 ± 1.1                         |
| Hemoglobin [g/dL]                         | Mean ± SD | 9.8 ± 1.4                      | 9.8 ± 1.4                          |
| Moderate anemia [Hb <8g/dL]               | n (%)     | 323 (11.4)                     | 144 (9.8)                          |

N = number of subjects

n = number of subjects in a given category

SD = Standard deviation

None of the baseline characteristics differed by group ( $p>0.05$ )

**Supplementary table 9. Vaccine efficacy: model selection using Cox regression with time dependent covariates for clinical malaria disease (primary case definition) (ATP)**

| Model                                  | -2 log likelihood | Parameters | Akaike's criterion | Schwarz Bayesian criterion <sup>§</sup> |
|----------------------------------------|-------------------|------------|--------------------|-----------------------------------------|
| No time-varying covariates             | 19837.4           | 1          | 19839.4            | 19844.9                                 |
| group*time <sup>-2</sup>               | 19834.7           | 2          | 19838.7            | 19849.6                                 |
| group*time <sup>-1</sup>               | 19825.8           | 2          | 19829.8            | 19840.7                                 |
| group*time <sup>-0.5</sup>             | 19807.9           | 2          | 19811.9            | 19822.8                                 |
| group*log(time)                        | 19787.6           | 2          | 19791.6            | 19802.5                                 |
| group*time                             | 19779.1           | 2          | 19783.1            | 19793.9                                 |
| group*time <sup>0.5</sup>              | 19778.6           | 2          | 19782.6            | 19793.4                                 |
| group*time <sup>2</sup>                | 19789.7           | 2          | 19793.7            | 19804.6                                 |
| Piecewise Cox regression <sup>§§</sup> | 19788.5           | 3          | 19794.5            | 19810.8                                 |

<sup>§</sup>Lowest Swartz Bayesian Criterion corresponds to best model fit among pre-specified models evaluated

<sup>§§</sup>Piecewise Cox regression splitting the time at risk in three periods, allowing in each one a third of the cases

**Supplementary table 10a. Clinical features of children with severe malaria aged 6 weeks - 17 months at enrollment (ATP)**

|                                                 |             | <b>All episodes<br/>primary case definition<br/>N = 282</b> |          |
|-------------------------------------------------|-------------|-------------------------------------------------------------|----------|
| <b>Frequency of markers of disease severity</b> |             | <b>n</b>                                                    | <b>%</b> |
| Prostration                                     |             | 63                                                          | 22.3     |
| Respiratory distress                            |             | 24                                                          | 8.5      |
| BCS $\leq 2$                                    |             | 20                                                          | 7.1      |
| Seizures 2 or more                              |             | 100                                                         | 35.5     |
| Hypoglycemia $< 2.2$ mmol/L                     |             | 12                                                          | 4.3      |
| Acidosis BE $\leq -10$ mmol/L                   |             | 147                                                         | 52.1     |
| Lactate $\geq 5$ mmol/L                         |             | 83                                                          | 29.4     |
| Anemia $< 5$ g/dL                               |             | 51                                                          | 18.1     |
| <b>Number of disease markers</b>                | 1           | 162                                                         | 57.4     |
|                                                 | 2           | 62                                                          | 22.0     |
|                                                 | 3           | 34                                                          | 12.1     |
|                                                 | 4           | 14                                                          | 5.0      |
|                                                 | 5           | 4                                                           | 1.4      |
|                                                 | 6           | 6                                                           | 2.1      |
| <b>Number of cases per site</b>                 | Agogo       | 28                                                          | 9.9      |
|                                                 | Bagamoyo    | 7                                                           | 2.5      |
|                                                 | Kilifi      | 0                                                           | 0.0      |
|                                                 | Kintampo    | 62                                                          | 22.0     |
|                                                 | Kombewa     | 55                                                          | 19.5     |
|                                                 | Korogwe     | 2                                                           | 0.7      |
|                                                 | Lambarene   | 7                                                           | 2.5      |
|                                                 | Lilongwe    | 10                                                          | 3.5      |
|                                                 | Manhica     | 1                                                           | 0.4      |
|                                                 | Nanoro      | 21                                                          | 7.4      |
|                                                 | Siaya       | 89                                                          | 31.6     |
| <b>Number of cases per age</b>                  | 5-17 months | 216                                                         | 76.6     |
|                                                 | 6-12 weeks  | 66                                                          | 23.4     |

N = number of events meeting the primary case definition

n = number of events meeting the primary case definition in a given category

% = n / Number of events meeting the primary case definition with available results

A total of 265 children experienced at least one episode of severe malaria. Overall, 282 cases of severe malaria occurred in these 265 children.

**Supplementary table 10b. Frequency of co-morbidities in children with severe malaria 6 weeks - 17 months of age at enrollment (ATP)**

|                                                     | All episodes, secondary case definition<br>N = 339 |      |
|-----------------------------------------------------|----------------------------------------------------|------|
|                                                     | n                                                  | %    |
| No co-morbidity detected                            | 282                                                | 83.2 |
| Pneumonia                                           | 6                                                  | 1.8  |
| Meningitis                                          | 1                                                  | 0.3  |
| Bacteremia*                                         | 17                                                 | 5.0  |
| Gastroenteritis                                     | 1                                                  | 0.3  |
| Co-morbidity not excluded (Algorithm not completed) | 39                                                 | 11.9 |

N = number of events meeting the secondary case definition

n = number of events meeting the case definition in a given category

% = n / Number of events meeting the secondary case definition with available results

\* Salmonella 10 (2.9%), *Streptococcus pneumoniae* 1 (0.3%), other pathogens 6 (1.8%)

The total percentage exceeds 100% because a child could have more than one co-morbidity during a severe malaria episode.

**Supplementary table 11a. Percentage of children aged 5-17 months at enrollment reporting a fatal serious adverse event over an average follow-up period 18 months (up to 24 months) post Dose-1 by MEDRA Preferred Term (ITT)**

|                                        | RTS,S/AS01<br>N = 5949 |     |        |     | Rabies vaccine<br>N = 2974 |     |        |     |
|----------------------------------------|------------------------|-----|--------|-----|----------------------------|-----|--------|-----|
|                                        | n                      | %   | 95% CI |     | n                          | %   | 95% CI |     |
| <b>Overview</b>                        |                        |     |        |     |                            |     |        |     |
| At least one symptom                   | 56                     | 0.9 | 0.7    | 1.2 | 28                         | 0.9 | 0.6    | 1.4 |
| At least one symptom excluding Malaria | 56                     | 0.9 | 0.7    | 1.2 | 28                         | 0.9 | 0.6    | 1.4 |
| <b>Fatal SAEs by Preferred Term</b>    |                        |     |        |     |                            |     |        |     |
| Anaemia                                | 8                      | 0.1 | 0.1    | 0.3 | 9                          | 0.3 | 0.1    | 0.6 |
| Disseminated intravascular coagulation | *1*                    |     |        |     | *1*                        |     |        |     |
| Neutropenia                            | *2*                    |     |        |     | *2*                        |     |        |     |
| Atrial septal defect                   | *1*                    |     |        |     | *1*                        |     |        |     |
| Cerebral palsy                         | *1*                    |     |        |     | *1*                        |     |        |     |
| Enteritis                              | *1*                    |     |        |     | *1*                        |     |        |     |
| Death                                  | 1                      | 0.0 | 0.0    | 0.1 | 1                          | 0.0 | 0.0    | 0.2 |
| Drowning                               | 3                      | 0.1 | 0.0    | 0.1 | 1                          | 0.0 | 0.0    | 0.2 |
| Hypothermia                            | *1*                    |     |        |     | *1*                        |     |        |     |
| Pyrexia                                | 1                      | 0.0 | 0.0    | 0.1 | 1                          | 0.0 | 0.0    | 0.2 |
| Bronchitis                             | *1*                    |     |        |     | *1*                        |     |        |     |
| Bronchopneumonia                       | 3                      | 0.1 | 0.0    | 0.1 | 1                          | 0.0 | 0.0    | 0.2 |
| Disseminated tuberculosis              | *1*                    |     |        |     | *1*                        |     |        |     |
| Dysentery                              | *2*                    |     |        |     | *2*                        |     |        |     |
| Encephalitic infection                 | *1*                    |     |        |     | *1*                        |     |        |     |
| Gastroenteritis                        | 16                     | 0.3 | 0.2    | 0.4 | 6                          | 0.2 | 0.1    | 0.4 |
| Gastroenteritis shigella               | *1*                    |     |        |     | *1*                        |     |        |     |
| Hiv infection                          | 12                     | 0.2 | 0.1    | 0.4 | 7                          | 0.2 | 0.1    | 0.5 |
| Klebsiella sepsis                      | *1*                    |     |        |     | *1*                        |     |        |     |
| Lobar pneumonia                        | *1*                    |     |        |     | *1*                        |     |        |     |
| Lower respiratory tract infection      | *1*                    |     |        |     | *1*                        |     |        |     |
| Lymph node tuberculosis                | *1*                    |     |        |     | *1*                        |     |        |     |
| Malaria                                | 3                      | 0.1 | 0.0    | 0.1 | 6                          | 0.2 | 0.1    | 0.4 |
| Measles                                | *1*                    |     |        |     | *1*                        |     |        |     |
| Meningitis                             | 4                      | 0.1 | 0.0    | 0.2 | 1                          | 0.0 | 0.0    | 0.2 |
| Oral candidiasis                       | *2*                    |     |        |     | *2*                        |     |        |     |
| Oropharyngeal candidiasis              | *1*                    |     |        |     | *1*                        |     |        |     |
| Otitis media                           | 1                      | 0.0 | 0.0    | 0.1 | 1                          | 0.0 | 0.0    | 0.2 |
| Pneumococcal sepsis                    | *2*                    |     |        |     | *2*                        |     |        |     |
| Pneumocystis jiroveci infection        | *1*                    |     |        |     | *1*                        |     |        |     |
| Pneumocystis jiroveci pneumonia        | *1*                    |     |        |     | *1*                        |     |        |     |
| Pneumonia                              | 16                     | 0.3 | 0.2    | 0.4 | 5                          | 0.2 | 0.1    | 0.4 |
| Salmonella sepsis                      | 1                      | 0.0 | 0.0    | 0.1 | 2                          | 0.1 | 0.0    | 0.2 |
| Sepsis                                 | 8                      | 0.1 | 0.1    | 0.3 | 5                          | 0.2 | 0.1    | 0.4 |
| Skin bacterial infection               | *1*                    |     |        |     | *1*                        |     |        |     |
| Upper respiratory tract infection      | *1*                    |     |        |     | *1*                        |     |        |     |
| Urinary tract infection                | *1*                    |     |        |     | *1*                        |     |        |     |
| Herbal toxicity                        | 2                      | 0.0 | 0.0    | 0.1 | 1                          | 0.0 | 0.0    | 0.2 |
| Hypoglycaemia                          | 3                      | 0.1 | 0.0    | 0.1 | 1                          | 0.0 | 0.0    | 0.2 |
| Kwashiorkor                            | 2                      | 0.0 | 0.0    | 0.1 | 1                          | 0.0 | 0.0    | 0.2 |
| Malnutrition                           | 8                      | 0.1 | 0.1    | 0.3 | 3                          | 0.1 | 0.0    | 0.3 |
| Marasmus                               | 7                      | 0.1 | 0.0    | 0.2 | 2                          | 0.1 | 0.0    | 0.2 |
| Brain neoplasm                         | *1*                    |     |        |     | *1*                        |     |        |     |
| Convulsion                             | 4                      | 0.1 | 0.0    | 0.2 | 8                          | 0.3 | 0.1    | 0.5 |
| Encephalitis                           | *1*                    |     |        |     | *1*                        |     |        |     |

|                      |     |     |     |     |     |     |     |     |
|----------------------|-----|-----|-----|-----|-----|-----|-----|-----|
| Febrile convulsion   | *2* |     |     |     | *2* |     |     |     |
| Asphyxia             | *1* |     |     |     | *1* |     |     |     |
| Pneumonia aspiration | 2   | 0.0 | 0.0 | 0.1 | 1   | 0.0 | 0.0 | 0.2 |
| Pulmonary oedema     | *1* |     |     |     | *1* |     |     |     |
| Shock                | *2* |     |     |     | *2* |     |     |     |

At least one symptom = at least one symptom experienced, regardless of the MedDRA Preferred Term

At least one symptom excluding Malaria= at least one symptom experienced (regardless of the MedDRA Preferred Term), excluding Malaria, *P. falciparum* infection and Cerebral malaria.

N = number of subjects with at least one administered dose

n/% = number/percentage of subjects reporting the symptom at least once

95% CI= exact 95% confidence interval; LL = Lower Limit, UL = Upper Limit

Tabulations that present single or multiple SAEs in one study group (RTS,S/AS01 or comparator) are presented in both study groups as \*n\*, indicating that there are n events in one of the study groups, to preserve the blind of the study.

**Supplementary table 11b. Percentage of children aged 6-12 weeks at enrollment reporting a fatal serious adverse event over an average follow-up period of 9 months (up to 17 months) post Dose-1 by MEDRA Preferred Term (ITT)**

|                                        | RTS,S/AS01<br>N = 4358 |     |        |     | MenC vaccine<br>N = 2179 |     |        |     |
|----------------------------------------|------------------------|-----|--------|-----|--------------------------|-----|--------|-----|
|                                        | n                      | %   | 95% CI |     | n                        | %   | 95% CI |     |
| <b>Overview</b>                        |                        |     |        |     |                          |     |        |     |
| At least one symptom                   | 49                     | 1.1 | 0.8    | 1.5 | 18                       | 0.8 | 0.5    | 1.3 |
| At least one symptom excluding Malaria | 49                     | 1.1 | 0.8    | 1.5 | 18                       | 0.8 | 0.5    | 1.3 |
| <b>Fatal SAEs by Preferred Term</b>    |                        |     |        |     |                          |     |        |     |
| Anaemia                                | 5                      | 0.1 | 0.0    | 0.3 | 1                        | 0.0 | 0.0    | 0.3 |
| Haemolytic anaemia                     | *1*                    |     |        |     | *1*                      |     |        |     |
| Congenital megacolon                   | *1*                    |     |        |     | *1*                      |     |        |     |
| Falot's tetralogy                      | *1*                    |     |        |     | *1*                      |     |        |     |
| Enteritis                              | 1                      | 0.0 | 0.0    | 0.1 | 1                        | 0.0 | 0.0    | 0.3 |
| Intussusception                        | *1*                    |     |        |     | *1*                      |     |        |     |
| Death                                  | 1                      | 0.0 | 0.0    | 0.1 | 1                        | 0.0 | 0.0    | 0.3 |
| Drowning                               | *1*                    |     |        |     | *1*                      |     |        |     |
| Pyrexia                                | *2*                    |     |        |     | *2*                      |     |        |     |
| Bronchitis                             | *1*                    |     |        |     | *1*                      |     |        |     |
| Bronchopneumonia                       | 5                      | 0.1 | 0.0    | 0.3 | 2                        | 0.1 | 0.0    | 0.3 |
| Febrile infection                      | *1*                    |     |        |     | *1*                      |     |        |     |
| Gastroenteritis                        | 13                     | 0.3 | 0.2    | 0.5 | 4                        | 0.2 | 0.1    | 0.5 |
| Hiv infection                          | 9                      | 0.2 | 0.1    | 0.4 | 2                        | 0.1 | 0.0    | 0.3 |
| Malaria                                | *1*                    |     |        |     | *1*                      |     |        |     |
| Meningitis                             | *3*                    |     |        |     | *3*                      |     |        |     |
| Meningitis pneumococcal                | *1*                    |     |        |     | *1*                      |     |        |     |
| Pneumococcal sepsis                    | 1                      | 0.0 | 0.0    | 0.1 | 2                        | 0.1 | 0.0    | 0.3 |
| Pneumocystis jiroveci pneumonia        | *3*                    |     |        |     | *3*                      |     |        |     |
| Pneumonia                              | 19                     | 0.4 | 0.3    | 0.7 | 6                        | 0.3 | 0.1    | 0.6 |
| Pneumonia primary atypical             | *1*                    |     |        |     | *1*                      |     |        |     |
| Salmonella sepsis                      | *1*                    |     |        |     | *1*                      |     |        |     |
| Sepsis                                 | 7                      | 0.2 | 0.1    | 0.3 | 3                        | 0.1 | 0.0    | 0.4 |
| Septic shock                           | *1*                    |     |        |     | *1*                      |     |        |     |
| Tuberculosis                           | *1*                    |     |        |     | *1*                      |     |        |     |
| Urinary tract infection                | *1*                    |     |        |     | *1*                      |     |        |     |
| Head injury                            | *2*                    |     |        |     | *2*                      |     |        |     |
| Herbal toxicity                        | *1*                    |     |        |     | *1*                      |     |        |     |
| Hypoglycaemia                          | 1                      | 0.0 | 0.0    | 0.1 | 2                        | 0.1 | 0.0    | 0.3 |
| Kwashiorkor                            | *1*                    |     |        |     | *1*                      |     |        |     |
| Marasmus                               | 2                      | 0.0 | 0.0    | 0.2 | 1                        | 0.0 | 0.0    | 0.3 |
| Convulsion                             | 3                      | 0.1 | 0.0    | 0.2 | 2                        | 0.1 | 0.0    | 0.3 |
| Encephalitis                           | *2*                    |     |        |     | *2*                      |     |        |     |
| Loss of consciousness                  | *1*                    |     |        |     | *1*                      |     |        |     |
| Pneumonia aspiration                   | *2*                    |     |        |     | *2*                      |     |        |     |

At least one symptom = at least one symptom experienced, regardless of the MedDRA Preferred Term

At least one symptom excluding Malaria= at least one symptom experienced (regardless of the MedDRA Preferred Term), excluding Malaria, *P. falciparum* infection and Cerebral malaria.

N = number of subjects with at least one administered dose

n/% = number/percentage of subjects reporting the symptom at least once

95% CI= exact 95% confidence interval; LL = Lower Limit, UL = Upper Limit

Tabulations that present single or multiple SAEs in one study group (RTS,S/AS01 or comparator) are presented in both study groups as \*n\*, indicating that there are n events in one of the study groups, to preserve the blind of the study.

**Supplementary table 12. Percentage of children aged 5-17 months at enrollment reporting adverse events (AEs) within the 30-day post-vaccination period (ITT)**

|                                                     | RTS,S/AS01<br>N = 1479 |      |        |      | Rabies vaccine<br>N = 721 |      |        |      |
|-----------------------------------------------------|------------------------|------|--------|------|---------------------------|------|--------|------|
|                                                     | n                      | %    | 95% CI |      | n                         | %    | 95% CI |      |
| LL                                                  |                        |      | UL     | LL   |                           |      | UL     |      |
| <b>Overview</b>                                     |                        |      |        |      |                           |      |        |      |
| At least one AE                                     | 1273                   | 86.1 | 84.2   | 87.8 | 626                       | 86.8 | 84.1   | 89.2 |
| At least one symptom excluding Malaria              | 1251                   | 84.6 | 82.6   | 86.4 | 612                       | 84.9 | 82.1   | 87.4 |
| <b>AEs with an incidence ≥ 5% by Preferred Term</b> |                        |      |        |      |                           |      |        |      |
| Conjunctivitis                                      | 111                    | 7.5  | 6.2    | 9.0  | 64                        | 8.9  | 6.9    | 11.2 |
| Diarrhea                                            | 188                    | 12.7 | 11.1   | 14.5 | 88                        | 12.2 | 9.9    | 14.8 |
| Enteritis                                           | 124                    | 8.4  | 7.0    | 9.9  | 62                        | 8.6  | 6.7    | 10.9 |
| Pyrexia                                             | 200                    | 13.5 | 11.8   | 15.4 | 67                        | 9.3  | 7.3    | 11.7 |
| Bronchitis                                          | 79                     | 5.3  | 4.3    | 6.6  | 32                        | 4.4  | 3.1    | 6.2  |
| Gastroenteritis                                     | 372                    | 25.2 | 23.0   | 27.4 | 170                       | 23.6 | 20.5   | 26.9 |
| Malaria                                             | 265                    | 17.9 | 16.0   | 20.0 | 173                       | 24.0 | 20.9   | 27.3 |
| Nasopharyngitis                                     | 115                    | 7.8  | 6.5    | 9.3  | 58                        | 8.0  | 6.2    | 10.3 |
| Pneumonia                                           | 166                    | 11.2 | 9.7    | 12.9 | 71                        | 9.8  | 7.8    | 12.3 |
| Rhinitis                                            | 95                     | 6.4  | 5.2    | 7.8  | 34                        | 4.7  | 3.3    | 6.5  |
| Upper respiratory tract infection                   | 638                    | 43.1 | 40.6   | 45.7 | 326                       | 45.2 | 41.5   | 48.9 |
| Cough                                               | 107                    | 7.2  | 6.0    | 8.7  | 41                        | 5.7  | 4.1    | 7.6  |

At least one AE = at least one AE experienced, regardless of the MedDRA Preferred Term  
 At least one symptom excluding Malaria= at least one symptom experienced (regardless of the MedDRA Preferred Term), excluding Malaria, *P. falciparum* infection and Cerebral malaria.  
 N = number of subjects with at least one administered dose. AEs during the first 30 days post-vaccination were recorded and analyzed only in the first 200 subjects enrolled at each site.  
 n/% = number/percentage of subjects reporting the symptom at least once  
 95% CI= exact 95% confidence interval; LL = Lower Limit, UL = Upper Limit

**Supplementary table 13a. Incidence of solicited local adverse events in children aged 5-17 months at enrollment reported during the 7-day post-vaccination period following each dose and overall (ITT)**

| Symptom       | Type    | RTS,S/AS01                       |      |         |      | Rabies vaccine                   |      |         |      |
|---------------|---------|----------------------------------|------|---------|------|----------------------------------|------|---------|------|
|               |         | n                                | %    | 95 % CI |      | N                                | %    | 95 % CI |      |
|               |         |                                  |      | LL      | UL   |                                  |      | LL      | UL   |
|               |         | <b>Dose 1<br/>N = 1479</b>       |      |         |      | <b>Dose 1<br/>N = 721</b>        |      |         |      |
| Pain          | All     | 247                              | 16.7 | 14.8    | 18.7 | 61                               | 8.5  | 6.5     | 10.7 |
|               | Grade 3 | 0                                | 0.0  | 0.0     | 0.2  | 0                                | 0.0  | 0.0     | 0.5  |
| Redness (mm)  | All     | 66                               | 4.5  | 3.5     | 5.6  | 26                               | 3.6  | 2.4     | 5.2  |
|               | Grade 3 | 2                                | 0.1  | 0.0     | 0.5  | 0                                | 0.0  | 0.0     | 0.5  |
| Swelling (mm) | All     | 140                              | 9.5  | 8.0     | 11.1 | 77                               | 10.7 | 8.5     | 13.2 |
|               | Grade 3 | 6                                | 0.4  | 0.1     | 0.9  | 0                                | 0.0  | 0.0     | 0.5  |
|               |         | <b>Dose 2<br/>N = 1435</b>       |      |         |      | <b>Dose 2<br/>N = 708</b>        |      |         |      |
| Pain          | All     | 179                              | 12.5 | 10.8    | 14.3 | 41                               | 5.8  | 4.2     | 7.8  |
|               | Grade 3 | 3                                | 0.2  | 0.0     | 0.6  | 0                                | 0.0  | 0.0     | 0.5  |
| Redness (mm)  | All     | 26                               | 1.8  | 1.2     | 2.6  | 18                               | 2.5  | 1.5     | 4.0  |
|               | Grade 3 | 3                                | 0.2  | 0.0     | 0.6  | 0                                | 0.0  | 0.0     | 0.5  |
| Swelling (mm) | All     | 140                              | 9.8  | 8.3     | 11.4 | 50                               | 7.1  | 5.3     | 9.2  |
|               | Grade 3 | 15                               | 1.0  | 0.6     | 1.7  | 0                                | 0.0  | 0.0     | 0.5  |
|               |         | <b>Dose 3<br/>N = 1407</b>       |      |         |      | <b>Dose 3<br/>N = 699</b>        |      |         |      |
| Pain          | All     | 108                              | 7.7  | 6.3     | 9.2  | 22                               | 3.1  | 2.0     | 4.7  |
|               | Grade 3 | 0                                | 0.0  | 0.0     | 0.3  | 0                                | 0.0  | 0.0     | 0.5  |
| Redness (mm)  | All     | 42                               | 3.0  | 2.2     | 4.0  | 13                               | 1.9  | 1.0     | 3.2  |
|               | Grade 3 | 2                                | 0.1  | 0.0     | 0.5  | 0                                | 0.0  | 0.0     | 0.5  |
| Swelling (mm) | All     | 134                              | 9.5  | 8.0     | 11.2 | 35                               | 5.0  | 3.5     | 6.9  |
|               | Grade 3 | 9                                | 0.6  | 0.3     | 1.2  | 0                                | 0.0  | 0.0     | 0.5  |
|               |         | <b>Overall/dose<br/>N = 4321</b> |      |         |      | <b>Overall/dose<br/>N = 2128</b> |      |         |      |
| Pain          | All     | 534                              | 12.4 | 11.4    | 13.4 | 124                              | 5.8  | 4.9     | 6.9  |
|               | Grade 3 | 3                                | 0.1  | 0.0     | 0.2  | 0                                | 0.0  | 0.0     | 0.2  |
| Redness (mm)  | All     | 134                              | 3.1  | 2.6     | 3.7  | 57                               | 2.7  | 2.0     | 3.5  |
|               | Grade 3 | 7                                | 0.2  | 0.1     | 0.3  | 0                                | 0.0  | 0.0     | 0.2  |
| Swelling (mm) | All     | 414                              | 9.6  | 8.7     | 10.5 | 162                              | 7.6  | 6.5     | 8.8  |
|               | Grade 3 | 30                               | 0.7  | 0.5     | 1.0  | 0                                | 0.0  | 0.0     | 0.2  |

N= number of administered doses. AEs during the first 30 days post-vaccination were recorded and analyzed only in the first 200 subjects enrolled at each site.

n/%= number/percentage of doses followed by at least one type of symptom

95%CI= Exact 95% confidence interval; LL = lower limit, UL = upper limit

**Supplementary table 13b. Incidence of solicited general adverse events in children aged 5-17 months at enrollment reported during the 7-day post-vaccination period following each dose and overall (ITT)**

| Symptom          | Type    | RTS,S/AS01               |      |         |      | Rabies vaccine           |      |         |      |
|------------------|---------|--------------------------|------|---------|------|--------------------------|------|---------|------|
|                  |         | n                        | %    | 95 % CI |      | n                        | %    | 95 % CI |      |
|                  |         | Dose 1<br>N = 1479       |      |         |      | Dose 1<br>N = 721        |      |         |      |
|                  |         | LL                       | UL   | LL      | UL   | LL                       | UL   | LL      | UL   |
| Drowsiness       | All     | 91                       | 6.2  | 5.0     | 7.5  | 27                       | 3.7  | 2.5     | 5.4  |
|                  | Grade 3 | 3                        | 0.2  | 0.0     | 0.6  | 0                        | 0.0  | 0.0     | 0.5  |
| Irritability     | All     | 165                      | 11.2 | 9.6     | 12.9 | 41                       | 5.7  | 4.1     | 7.6  |
|                  | Grade 3 | 0                        | 0.0  | 0.0     | 0.2  | 0                        | 0.0  | 0.0     | 0.5  |
| Loss of appetite | All     | 202                      | 13.7 | 11.9    | 15.5 | 71                       | 9.8  | 7.8     | 12.3 |
|                  | Grade 3 | 3                        | 0.2  | 0.0     | 0.6  | 0                        | 0.0  | 0.0     | 0.5  |
| Temperature      | All     | 385                      | 26.0 | 23.8    | 28.3 | 108                      | 15.0 | 12.5    | 17.8 |
|                  | Grade 3 | 29                       | 2.0  | 1.3     | 2.8  | 7                        | 1.0  | 0.4     | 2.0  |
|                  |         | Dose 2<br>N = 1435       |      |         |      | Dose 2<br>N = 708        |      |         |      |
| Drowsiness       | All     | 99                       | 6.9  | 5.6     | 8.3  | 37                       | 5.2  | 3.7     | 7.1  |
|                  | Grade 3 | 1                        | 0.1  | 0.0     | 0.4  | 0                        | 0.0  | 0.0     | 0.5  |
| Irritability     | All     | 192                      | 13.4 | 11.7    | 15.3 | 45                       | 6.4  | 4.7     | 8.4  |
|                  | Grade 3 | 2                        | 0.1  | 0.0     | 0.5  | 0                        | 0.0  | 0.0     | 0.5  |
| Loss of appetite | All     | 151                      | 10.5 | 9.0     | 12.2 | 47                       | 6.6  | 4.9     | 8.7  |
|                  | Grade 3 | 0                        | 0.0  | 0.0     | 0.3  | 0                        | 0.0  | 0.0     | 0.5  |
| Temperature      | All     | 503                      | 35.1 | 32.6    | 37.6 | 100                      | 14.1 | 11.6    | 16.9 |
|                  | Grade 3 | 42                       | 2.9  | 2.1     | 3.9  | 10                       | 1.4  | 0.7     | 2.6  |
|                  |         | Dose 3<br>N = 1407       |      |         |      | Dose 3<br>N = 699        |      |         |      |
| Drowsiness       | All     | 97                       | 6.9  | 5.6     | 8.3  | 29                       | 4.1  | 2.8     | 5.9  |
|                  | Grade 3 | 1                        | 0.1  | 0.0     | 0.4  | 0                        | 0.0  | 0.0     | 0.5  |
| Irritability     | All     | 138                      | 9.8  | 8.3     | 11.5 | 27                       | 3.9  | 2.6     | 5.6  |
|                  | Grade 3 | 1                        | 0.1  | 0.0     | 0.4  | 0                        | 0.0  | 0.0     | 0.5  |
| Loss of appetite | All     | 138                      | 9.8  | 8.3     | 11.5 | 40                       | 5.7  | 4.1     | 7.7  |
|                  | Grade 3 | 2                        | 0.1  | 0.0     | 0.5  | 0                        | 0.0  | 0.0     | 0.5  |
| Temperature      | All     | 457                      | 32.5 | 30.0    | 35.0 | 77                       | 11.0 | 8.8     | 13.6 |
|                  | Grade 3 | 39                       | 2.8  | 2.0     | 3.8  | 7                        | 1.0  | 0.4     | 2.1  |
|                  |         | Overall/dose<br>N = 4321 |      |         |      | Overall/dose<br>N = 2128 |      |         |      |
| Drowsiness       | All     | 287                      | 6.6  | 5.9     | 7.4  | 93                       | 4.4  | 3.5     | 5.3  |
|                  | Grade 3 | 5                        | 0.1  | 0.0     | 0.3  | 0                        | 0.0  | 0.0     | 0.2  |
| Irritability     | All     | 495                      | 11.5 | 10.5    | 12.4 | 113                      | 5.3  | 4.4     | 6.3  |
|                  | Grade 3 | 3                        | 0.1  | 0.0     | 0.2  | 0                        | 0.0  | 0.0     | 0.2  |
| Loss of appetite | All     | 491                      | 11.4 | 10.4    | 12.3 | 158                      | 7.4  | 6.3     | 8.6  |
|                  | Grade 3 | 5                        | 0.1  | 0.0     | 0.3  | 0                        | 0.0  | 0.0     | 0.2  |
| Temperature      | All     | 1345                     | 31.1 | 29.7    | 32.5 | 285                      | 13.4 | 12.0    | 14.9 |
|                  | Grade 3 | 110                      | 2.5  | 2.1     | 3.1  | 24                       | 1.1  | 0.7     | 1.7  |

N= number of administered doses. AEs during the first 30 days post-vaccination were recorded and analyzed only in the first 200 subjects enrolled at each site.

n/%= number/percentage of doses followed by at least one type of symptom

95%CI= Exact 95% confidence interval; LL = lower limit, UL = upper limit

**Supplementary table 14. Seropositivity rates and geometric mean titers (GMTs) for Anti-CS antibodies (ATP)**

|                |                     |      | ≥ 0.5 EU/mL |      |        |      | GMT   |        |       |      |        |
|----------------|---------------------|------|-------------|------|--------|------|-------|--------|-------|------|--------|
|                |                     |      |             |      | 95% CI |      |       | 95% CI |       |      |        |
| Group          | Timing              | N    | n           | %    | LL     | UL   | value | LL     | UL    | Min  | Max    |
| RTS,S/AS01     | Screening           | 1034 | 132         | 12.8 | 10.8   | 15.0 | 0.3   | 0.3    | 0.3   | <0.5 | 7.7    |
|                | 1 month post-Dose 3 | 1033 | 1032        | 99.9 | 99.5   | 100  | 621.2 | 591.7  | 652.1 | <0.5 | 8147.2 |
| Rabies vaccine | Screening           | 524  | 46          | 8.8  | 6.5    | 11.5 | 0.3   | 0.3    | 0.3   | <0.5 | 16.2   |
|                | 1 month post-Dose 3 | 528  | 31          | 5.9  | 4.0    | 8.2  | 0.3   | 0.3    | 0.3   | <0.5 | 329.9  |

GMT = geometric mean antibody titer calculated on all subjects

N = number of subjects with available results. Immunogenicity data were analyzed only in the first 200 subjects enrolled at each site.

n = number of subjects with antibody titer greater than or equal cut-off

n/% = number/percentage of subjects with concentration within the specified range

95% CI = 95% confidence interval; LL = Lower Limit, UL = Upper Limit

Min/Max = Minimum/Maximum
